# Supplementary material for: The Dimensions of Primary Mitochondrial Disorders
Source: Front Cell Dev Biol. 2020 Nov 26;8:600079. doi: 10.3389/fcell.2020.600079 (PMC7726223; doi:10.3389/fcell.2020.600079)
Supplement: Supplementary Table 1 — Evidence for pathogenicity for 45 published mitochondrial disease genes not listed in OMIM. [file Table_1.XLSX]

## Sheet: Not_OMIM_Genes
Ensembl ID	Gene name	OMIM	OMIM_entrez_ID	OMIM_MIM number	OMIM_Mode of Inheritance	OMIM_Phenotype	Chromosomal location	S. Stenton 2020	S. Rahman 2020	A. Frazier 2019	M. Falk 2020	Reference
ENSG00000124172	ATP5F1E	606153	514	614053	.	?Mitochondrial complex V (ATP synthase) deficiency, nuclear type 3	20q13.32	yes	yes	yes	yes	DOI: 10.1093/hmg/ddq254
ENSG00000173992	CCS	603864	9973	.	.	.	11q13.2	no	yes	no	no	DOI: 10.1002/humu.22099
ENSG00000121289	CEP89	615470	84902	.	.	.	19q13.11	yes	yes	yes	yes	DOI: 10.1093/hmg/ddt170
ENSG00000110871	COQ5	616359	84274	.	.	.	12q24.31	yes	yes	yes	yes	DOI: 10.1002/humu.23345
ENSG00000131143	COX4I1	123864	1327	.	.	.	16q24.1	yes	yes	yes	yes	DOI: 10.1038/ejhg.2017.112, DOI: 10.1002/ajmg.a.61288
ENSG00000178741	COX5A	603773	9377	.	.	.	15q24.2	yes	yes	yes	yes	DOI: 10.1002/humu.23210
ENSG00000130159	ECSIT	608388	51295	.	.	.	19p13.2	no	yes	no	no	DOI: 10.1038/nm.4456
ENSG00000127554	GFER	600924	2671	613076	.	Myopathy, mitochondrial progressive, with congenital cataract, hearing loss, and developmental delay	16p13.3	yes	yes	yes	yes	DOI: 10.1016/j.ajhg.2009.04.004, DOI: 10.1177/0883073815587327, DOI: 10.1111/cge.12985
ENSG00000115541	HSPE1	600141	3336	.	.	.	2q33.1	no	yes	no	no	DOI: 10.3389/fmolb.2016.00065
ENSG00000182054	IDH2	147650	3418	613657	.	D-2-hydroxyglutaric aciduria 2	15q26.1	yes	yes	no	no	DOI: 10.1126/science.1192632
ENSG00000166411	IDH3A	601149	3419	.	.	.	15q25.1	yes	yes	yes	yes	DOI: 10.1016/j.ophtha.2017.03.010, DOI: 0.1007/s10048-016-0507-z, DOI: 10.1080/13816810.2019.1605391
ENSG00000101365	IDH3B	604526	3420	612572	.	Retinitis pigmentosa 46	20p13	yes	yes	yes	yes	DOI: 10.1038/ng.223, DOI: 10.1002/mgg3.1044
ENSG00000100294	MCAT	614479	27349	.	.	.	22q13.2	yes	no	no	no	DOI: 10.1093/hmg/ddz311
ENSG00000014641	MDH1	154200	4190	618959	.	?Epileptic encephalopathy, early infantile, 88	2p15	yes	no	no	no	DOI: 10.1007/s00439-019-02063-z
ENSG00000165487	MICU2	610632	221154	.	.	.	13q12.11	yes	yes	yes	yes	DOI: 10.1093/brain/awx237
ENSG00000177427	MIEF2	615498	125170	.	.	.	17p11.2	yes	yes	no	yes	DOI: 10.1093/hmg/ddy033
ENSG00000143314	MRPL24	611836	79590	.	.	.	1q23.1	yes	no	no	no	DOI: 10.1016/j.nbd.2020.104880
ENSG00000131368	MRPS25	611987	64432	.	.	.	3p25.1	yes	yes	no	no	DOI: 10.1093/hmg/ddz093
ENSG00000189043	NDUFA4	603833	4697	.	.	.	7p21.3	yes	yes	yes	yes	DOI: 10.1016/j.celrep.2013.05.005
ENSG00000119421	NDUFA8	603359	4702	.	.	.	9q33.2	yes	no	no	no	DOI: 10.1111/cge.13773
ENSG00000003509	NDUFAF7	615898	55471	.	.	.	2p22.2	no	yes	no	no	DOI: 10.1167/iovs.16-20941
ENSG00000140990	NDUFB10	603843	4716	.	.	.	16p13.3	yes	yes	yes	yes	DOI: 10.1093/hmg/ddw431
ENSG00000244005	NFS1	603485	9054	.	.	.	20q11.22	yes	yes	yes	yes	DOI:10.1002/mgg3.46
ENSG00000103024	NME3	601817	4832	.	.	.	16p13.3	yes	no	no	no	DOI: 10.1073/pnas.1818629116
ENSG00000178694	NSUN3	617491	63899	.	.	.	3q11.2	yes	yes	yes	yes	DOI: 10.1038/ncomms12039, DOI: 10.1007/s12031-020-01595-8
ENSG00000155463	OXA1L	601066	5018	.	.	.	14q11.2	yes	yes	no	yes	DOI: 10.15252/emmm.201809060
ENSG00000168291	PDHB	179060	5162	614111	.	Pyruvate dehydrogenase E1-beta deficiency	3p14.3	yes	yes	yes	yes	DOI: 10.1007/s00439-004-1124-8, DOI: 10.1016/j.ymgme.2007.10.135, DOI: 10.1093/jnen/nlv022
ENSG00000090857	PDPR	617835	55066	.	.	.	16q22.1	no	yes	no	no	DOI: 10.1016/j.celrep.2014.12.015
ENSG00000232838	PET117	614771	100303755	.	.	.	20p11.23	yes	yes	yes	yes	DOI: 10.1007/s00439-017-1794-7
ENSG00000107959	PITRM1	618211	10531	.	.	.	10p15.2	yes	yes	no	yes	DOI: 10.15252/emmm.201505894, DOI: 10.1136/jmedgenet-2018-105330
ENSG00000006757	PNPLA4	300102	8228	.	.	.	Xp22.31	no	yes	yes	yes	DOI: 10.1371/journal.pgen.1005679
ENSG00000132300	PTCD3	614918	55037	.	.	.	2p11.2	yes	yes	no	no	DOI: 10.1007/s10048-018-0561-9
ENSG00000183048	SLC25A10	606794	1468	618972	.	?Mitochondrial DNA depletion syndrome 19	17q25.3	yes	yes	no	yes	DOI: 10.1093/hmg/ddx419
ENSG00000075415	SLC25A3	600370	5250	610773	.	Mitochondrial phosphate carrier deficiency	12q23.1	yes	yes	yes	yes	DOI: 10.1086/511788, DOI: 10.1007/8904_2014_364
ENSG00000137767	SQOR	617658	58472	.	.	.	15q21.1	yes	yes	no	no	DOI: 10.1002/jimd.12232
ENSG00000106028	SSBP1	600439	6742	.	.	.	7q34	yes	yes	no	no	DOI: 10.1093/brain/awx295, DOI: 10.1172/JCI128514
ENSG00000164983	TMEM65	616609	157378	.	.	.	8q24.13	yes	yes	yes	yes	DOI: 10.1038/ejhg.2017.20
ENSG00000154174	TOMM70	606081	9868	.	.	.	3q12.2	yes	no	no	no	DOI: 10.1038/s10038-019-0714-1
ENSG00000126602	TRAP1	606219	10131	.	.	.	16p13.3	no	yes	no	no	DOI: 10.1038/ki.2013.417
ENSG00000265972	TXNIP	606599	10628	.	.	.	1q21.1	yes	yes	no	no	DOI: 10.2337/db18-0557
