# Supplementary material for: The Dimensions of Primary Mitochondrial Disorders
Source: Front Cell Dev Biol. 2020 Nov 26;8:600079. doi: 10.3389/fcell.2020.600079 (PMC7726223; doi:10.3389/fcell.2020.600079)
Supplement: Supplementary Table 2 — Current list of published mitochondrial disease genes. [file Table_2.XLSX]

## Sheet: AllMitochondrialDiseaseGenes
Ensembl ID	Gene name	Category	Function	Multiple functions	Inheritance	List	MitoCarta2.0	OMIM (07/2020)	OMIM_entrez_ID	OMIM_phenotype	OMIM_MIM number	OMIM_inheritance	S. Stenton 2020	S. Rahman 2020	A. Frazier 2019	M. Falk 2020
ENSG00000124608	AARS2	Mitochondrial DNA replication and expression	Mitochondrial tRNA synthetases	no	AR	272	yes	yes	57505	Combined oxidative phosphorylation deficiency 8, 614096 Y-Autosomal recessive; Leukoencephalopathy, progressive, with ovarian failure, 615889 Y-Autosomal recessive	612035	AR	yes	yes	yes	yes
ENSG00000183044	ABAT	Others / Unknown function	Others / Unknown function	no	AR	272	yes	yes	18	GABA-transaminase deficiency, 613163 Y-Autosomal recessive	137150	AR	yes	yes	yes	yes
ENSG00000115657	ABCB6	Metabolism of cofactors	Haem biosynthesis	no	AD	413	yes	yes	10058	Dyschromatosis universalis hereditaria 3, 615402 Y-Autosomal dominant; Microphthalmia, isolated, with coloboma 7, 614497 Y-Autosomal dominant; [Blood group, Langereis system], 111600 (3); Pseudohyperkalemia, familial, 2, due to red cell leak, 609153 Y-Autosomal dominant	605452	AD	no	yes	no	no
ENSG00000131269	ABCB7	Metabolism of cofactors	Iron–sulphur cluster protein biosynthesis	no	XLR	413	yes	yes	22	Anemia, sideroblastic, with ataxia, 301310 Y-X-linked recessive	300135	XLR	no	yes	yes	yes
ENSG00000177646	ACAD9	OXPHOS subunits, assembly factors, and electron carriers	CI assembly factors	no	AR	272	yes	yes	28976	Mitochondrial complex I deficiency, nuclear type 20, 611126 Y-Autosomal recessive	611103	AR	yes	yes	yes	yes
ENSG00000117054	ACADM	Metabolism of substrates	Fatty acid oxidation	no	AR	413	yes	yes	34	Acyl-CoA dehydrogenase, medium chain, deficiency of, 201450 Y-Autosomal recessive	607008	AR	yes	no	no	no
ENSG00000122971	ACADS	Metabolism of substrates	Fatty acid oxidation	no	AR	413	yes	yes	35	Acyl-CoA dehydrogenase, short-chain, deficiency of, 201470 Y-Autosomal recessive	606885	AR	yes	no	no	no
ENSG00000196177	ACADSB	Metabolism of substrates	Fatty acid oxidation	no	AR	413	yes	yes	36	2-methylbutyrylglycinuria, 610006 Y-Autosomal recessive	600301	AR	yes	no	no	no
ENSG00000072778	ACADVL	Metabolism of substrates	Fatty acid oxidation	no	AR	413	yes	yes	37	VLCAD deficiency, 201475 Y-Autosomal recessive	609575	AR	yes	no	no	no
ENSG00000075239	ACAT1	Metabolism of substrates	Ketone bodies	no	AR	413	yes	yes	38	Alpha-methylacetoacetic aciduria, 203750 Y-Autosomal recessive	607809	AR	yes	no	no	no
ENSG00000100412	ACO2	Metabolism of substrates	Tricarboxylic acid cycle enzymes	no	AR	272	yes	yes	50	Infantile cerebellar-retinal degeneration, 614559 Y-Autosomal recessive; ?Optic atrophy 9, 616289 Y-Autosomal recessive	100850	AR	yes	yes	yes	yes
ENSG00000141385	AFG3L2	Mitochondrial dynamics, homeostasis, and quality control	Mitochondrial protein quality control	no	AR/AD	272	yes	yes	10939	Spastic ataxia 5, autosomal recessive, 614487 Y-Autosomal recessive; Spinocerebellar ataxia 28, 610246 Y-Autosomal dominant	604581	AR+AD	yes	yes	yes	yes
ENSG00000006530	AGK	Mitochondrial dynamics, homeostasis, and quality control	Mitochondrial membrane phospholipid and import machinery	no	AR	272	yes	yes	55750	Sengers syndrome, 212350 Y-Autosomal recessive; Cataract 38, autosomal recessive, 614691 Y-Autosomal recessive	610345	AR	yes	yes	yes	yes
ENSG00000156709	AIFM1	Mitochondrial dynamics, homeostasis, and quality control	Mitochondrial membrane phospholipid and import machinery	no	XLR	272	yes	yes	9131	Cowchock syndrome, 310490 Y-X-linked recessive; Spondyloepimetaphyseal dysplasia, X-linked, with hypomyelinating leukodystrophy, 300232 Y-X-linked recessive; Combined oxidative phosphorylation deficiency 6, 300816 Y-X-linked recessive; Deafness, X-linked 5, 300614 Y-X-linked recessive	300169	XLR	yes	yes	yes	yes
ENSG00000158578	ALAS2	Metabolism of cofactors	Haem biosynthesis	no	XLR	413	yes	yes	212	Protoporphyria, erythropoietic, X-linked, 300752 Y-X-linked; Anemia, sideroblastic, 1, 300751 Y-X-linked recessive	301300	XLR	no	yes	no	no
ENSG00000059573	ALDH18A1	Metabolism of substrates	Tricarboxylic acid cycle enzymes	no	AR/AD	413	yes	yes	5832	Cutis laxa, autosomal recessive, type IIIA, 219150 Y-Autosomal recessive; Cutis laxa, autosomal dominant 3, 616603 Y-Autosomal dominant; Spastic paraplegia 9B, autosomal recessive, 616586 Y-Autosomal recessive; Spastic paraplegia 9A, autosomal dominant, 601162 Y-Autosomal dominant	138250	AR+AD	no	yes	yes	yes
ENSG00000160746	ANO10	Others / Unknown function	Others / Unknown function	no	AR	413	no	yes	55129	Spinocerebellar ataxia, autosomal recessive 10, 613728 Y-Autosomal recessive	613726	AR	no	yes	no	no
ENSG00000256053	APOPT1	Mitochondrial dynamics, homeostasis, and quality control	Apoptosis defect	no	AR	272	yes	yes	84334	Mitochondrial complex IV deficiency	220110	AR	yes	yes	yes	yes
ENSG00000137074	APTX	Mitochondrial DNA replication and expression	DNA repair	no	AR	413	no	yes	54840	Ataxia, early-onset, with oculomotor apraxia and hypoalbuminemia, 208920 Y-Autosomal recessive	606350	AR	no	yes	no	no
ENSG00000197785	ATAD3A	Mitochondrial dynamics, homeostasis, and quality control	Mitochondrial protein quality control	no	AR/AD	272	yes	yes	55210	Harel-Yoon syndrome, 617183 Y-Autosomal dominant, Autosomal recessive	612316	AD	yes	yes	yes	yes
ENSG00000152234	ATP5F1A	OXPHOS subunits, assembly factors, and electron carriers	CV subunits	no	AR	272	yes	yes	498	?Mitochondrial complex V (ATP synthase) deficiency, nuclear type 4, 615228 Y-Autosomal recessive; ?Combined oxidative phosphorylation deficiency 22, 616045 Y-Autosomal recessive	164360	AR	yes	yes	yes	yes
ENSG00000099624	ATP5F1D	OXPHOS subunits, assembly factors, and electron carriers	CV subunits	no	AR	413	yes	yes	513	Mitochondrial complex V (ATP synthase) deficiency, 618120 Y-Autosomal recessive	603150	AR	yes	yes	no	yes
ENSG00000124172	ATP5F1E	OXPHOS subunits, assembly factors, and electron carriers	CV subunits	no	AR	272	yes	no	.	?Mitochondrial complex V (ATP synthase) deficiency, nuclear type 3	.	.	yes	yes	yes	yes
ENSG00000173915	ATP5MD	OXPHOS subunits, assembly factors, and electron carriers	CV assembly factors	no	AR	413	yes	yes	84833	Mitochondrial complex V (ATP synthase) deficiency, nuclear type 6, 618683 Y-Autosomal recessive	615204	AR	yes	yes	no	yes
ENSG00000171953	ATPAF2	OXPHOS subunits, assembly factors, and electron carriers	CV assembly factors	no	AR	272	yes	yes	91647	?Mitochondrial complex V (ATP synthase) deficiency, nuclear type 1, 604273 Y-Autosomal recessive	608918	AR	yes	yes	yes	yes
ENSG00000074582	BCS1L	OXPHOS subunits, assembly factors, and electron carriers	CIII assembly factors	no	AR	272	yes	yes	617	Leigh syndrome, 256000 Y-Mitochondrial, Autosomal recessive; GRACILE syndrome, 603358 Y-Autosomal recessive; Bjornstad syndrome, 262000 Y-Autosomal recessive; Mitochondrial complex III deficiency, nuclear type 1, 124000 Y-Autosomal recessive	603647	AR	yes	yes	yes	yes
ENSG00000163170	BOLA3	Metabolism of cofactors	Iron–sulphur cluster protein biosynthesis	no	AR	272	yes	yes	388962	Multiple mitochondrial dysfunctions syndrome 2 with hyperglycinemia, 614299 Y-Autosomal recessive	613183	AR	yes	yes	yes	yes
ENSG00000169814	BTD	Metabolism of cofactors	Biotin metabolism	no	AR	413	no	yes	686	Biotinidase deficiency, 253260 Y-Autosomal recessive	609019	AR	yes	yes	no	yes
ENSG00000130921	C12orf65	Mitochondrial DNA replication and expression	Translation regulation	no	AR	272	yes	yes	91574	Spastic paraplegia 55, autosomal recessive, 615035 Y-Autosomal recessive; Combined oxidative phosphorylation deficiency 7, 613559 Y-Autosomal recessive	613541	AR	yes	yes	yes	yes
ENSG00000131943	C19orf12	Others / Unknown function	Others / Unknown function	no	AR/AD	413	no	yes	83636	Neurodegeneration with brain iron accumulation 4, 614298 Y-Autosomal dominant, Autosomal recessive; ?Spastic paraplegia 43, autosomal recessive, 615043 Y-Autosomal recessive	614297	AR+AD	no	yes	yes	yes
ENSG00000174917	C19orf70	Mitochondrial dynamics, homeostasis, and quality control	MICOS complex / Ca2+ homoeostasis	yes	AR	272	yes	yes	125988	Combined oxidative phosphorylation deficiency 37, 618329 Y-Autosomal recessive	616658	AR	yes	yes	yes	yes
ENSG00000108561	C1QBP	Mitochondrial DNA replication and expression	Translation regulation	no	AR	272	yes	yes	708	Combined oxidative phosphorylation deficiency 33, 617713 Y-Autosomal recessive	601269	AR	yes	yes	yes	yes
ENSG00000174990	CA5A	Metabolism of substrates	Anaplerosis	no	AR	413	yes	yes	763	Hyperammonemia due to carbonic anhydrase VA deficiency, 615751 Y-Autosomal recessive	114761	AR	yes	yes	no	no
ENSG00000134905	CARS2	Mitochondrial DNA replication and expression	Mitochondrial tRNA synthetases	no	AR	272	yes	yes	79587	Combined oxidative phosphorylation deficiency 27, 616672 Y-Autosomal recessive	612800	AR	yes	yes	yes	yes
ENSG00000173992	CCS	Metabolism of cofactors	Copper transport	no	AR	413	no	no	.	.	.	.	no	yes	no	no
ENSG00000121289	CEP89	OXPHOS subunits, assembly factors, and electron carriers	CIV assembly factors	no	AR	272	yes	no	.	.	.	.	yes	yes	yes	yes
ENSG00000250479	CHCHD10	Mitochondrial dynamics, homeostasis, and quality control	MICOS complex	no	AD	272	yes	yes	400916	Spinal muscular atrophy, Jokela type, 615048 Y-Autosomal dominant; Frontotemporal dementia and/or amyotrophic lateral sclerosis 2, 615911 Y-Autosomal dominant; ?Myopathy, isolated mitochondrial, autosomal dominant, 616209 Y-Autosomal dominant	615903	AD	yes	yes	yes	yes
ENSG00000106153	CHCHD2	Mitochondrial dynamics, homeostasis, and quality control	MICOS complex	no	AD	413	yes	yes	51142	Parkinson disease 22, autosomal dominant, 616710 Y-Autosomal dominant	616244	AD	no	yes	no	no
ENSG00000100288	CHKB	Mitochondrial dynamics, homeostasis, and quality control	Mitochondrial membrane phospholipid and import machinery	no	AR	413	no	yes	1120	Muscular dystrophy, congenital, megaconial type, 602541 Y-Autosomal recessive	612395	AR	no	yes	yes	yes
ENSG00000145354	CISD2	Others / Unknown function	Others / Unknown function	no	AR	413	yes	yes	493856	Wolfram syndrome 2, 604928 Y-Autosomal recessive	611507	AR	no	yes	no	no
ENSG00000162129	CLPB	Mitochondrial dynamics, homeostasis, and quality control	Mitochondrial protein quality control	no	AR	272	yes	yes	81570	3-methylglutaconic aciduria, type VII, with cataracts, neurologic involvement and neutropenia, 616271 Y-Autosomal recessive	616254	AR	yes	yes	yes	yes
ENSG00000125656	CLPP	Mitochondrial dynamics, homeostasis, and quality control	Mitochondrial protein quality control	no	AR	272	yes	yes	8192	Perrault syndrome 3, 614129 Y-Autosomal recessive	601119	AR	yes	yes	yes	yes
ENSG00000166855	CLPX	Mitochondrial dynamics, homeostasis, and quality control	Mitochondrial protein quality control	no	AD	413	yes	yes	10845	?Protoporphyria, erythropoietic, 2, 618015 Y-Autosomal dominant	615611	AD	no	yes	no	no
ENSG00000183978	COA3	OXPHOS subunits, assembly factors, and electron carriers	CIV assembly factors	no	AR	272	yes	yes	28958	?Mitochondrial complex IV deficiency	614775	AR	yes	yes	yes	yes
ENSG00000183513	COA5	OXPHOS subunits, assembly factors, and electron carriers	CIV assembly factors	no	AR	272	yes	yes	493753	?Cardioencephalomyopathy, fatal infantile, due to cytochrome c oxidase deficiency 3, 616500 Y-Autosomal recessive	613920	AR	yes	yes	yes	yes
ENSG00000168275	COA6	Metabolism of cofactors / OXPHOS subunits, assembly factors, and electron carriers	Copper transport / CIV assembly factors	yes	AR	272	yes	yes	388753	Cardioencephalomyopathy, fatal infantile, due to cytochrome c oxidase deficiency 4, 616501 Y-Autosomal recessive	614772	AR	yes	yes	yes	yes
ENSG00000162377	COA7	OXPHOS subunits, assembly factors, and electron carriers	CIV assembly factors	no	AR	272	yes	yes	65260	Spinocerebellar ataxia, autosomal recessive, with axonal neuropathy 3, 618387 Y-Autosomal recessive	615623	AR	yes	yes	yes	yes
ENSG00000068120	COASY	Metabolism of cofactors	CoA metabolism and transport	no	AR	272	yes	yes	80347	Neurodegeneration with brain iron accumulation 6, 615643 Y-Autosomal recessive; Pontocerebellar hypoplasia, type 12, 618266 Y-Autosomal recessive	609855	AR	yes	yes	yes	yes
ENSG00000173085	COQ2	OXPHOS subunits, assembly factors, and electron carriers	Coenzyme Q10	no	AR	272	yes	yes	27235	{Multiple system atrophy, susceptibility to}, 146500 Y-Autosomal dominant, Autosomal recessive; Coenzyme Q10 deficiency, primary, 1, 607426 Y-Autosomal recessive	609825	AR+AD	yes	yes	yes	yes
ENSG00000167113	COQ4	OXPHOS subunits, assembly factors, and electron carriers	Coenzyme Q10	no	AR	272	yes	yes	51117	Coenzyme Q10 deficiency, primary, 7, 616276 Y-Autosomal recessive	612898	AR	yes	yes	yes	yes
ENSG00000110871	COQ5	OXPHOS subunits, assembly factors, and electron carriers	Coenzyme Q10	no	AR	272	yes	no	.	.	.	.	yes	yes	yes	yes
ENSG00000119723	COQ6	OXPHOS subunits, assembly factors, and electron carriers	Coenzyme Q10	no	AR	272	yes	yes	51004	Coenzyme Q10 deficiency, primary, 6, 614650 Y-Autosomal recessive	614647	AR	yes	yes	yes	yes
ENSG00000167186	COQ7	OXPHOS subunits, assembly factors, and electron carriers	Coenzyme Q10	no	AR	272	yes	yes	10229	?Coenzyme Q10 deficiency, primary, 8, 616733 Y-Autosomal recessive	601683	AR	yes	yes	yes	yes
ENSG00000163050	COQ8A	OXPHOS subunits, assembly factors, and electron carriers	Coenzyme Q10	no	AR	272	yes	yes	56997	Coenzyme Q10 deficiency, primary, 4, 612016 Y-Autosomal recessive	606980	AR	yes	yes	yes	yes
ENSG00000123815	COQ8B	OXPHOS subunits, assembly factors, and electron carriers	Coenzyme Q10	no	AR	272	yes	yes	79934	Nephrotic syndrome, type 9, 615573 Y-Autosomal recessive	615567	AR	yes	yes	yes	yes
ENSG00000088682	COQ9	OXPHOS subunits, assembly factors, and electron carriers	Coenzyme Q10	no	AR	272	yes	yes	57017	Coenzyme Q10 deficiency, primary, 5, 614654 Y-Autosomal recessive	612837	AR	yes	yes	yes	yes
ENSG00000006695	COX10	Metabolism of cofactors / OXPHOS subunits, assembly factors, and electron carriers	Haem biosynthesis / CIV assembly factors	yes	AR	272	yes	yes	1352	Leigh syndrome due to mitochondrial COX4 deficiency, Mitochondrial complex IV deficiency	256000, 220110	AR	yes	yes	yes	yes
ENSG00000178449	COX14	OXPHOS subunits, assembly factors, and electron carriers	CIV assembly factors	no	AR	272	yes	yes	84987	?Mitochondrial complex IV deficiency	220110	AR	yes	yes	yes	yes
ENSG00000014919	COX15	Metabolism of cofactors / OXPHOS subunits, assembly factors, and electron carriers	Haem biosynthesis / CIV assembly factors	yes	AR	272	yes	yes	1355	Cardioencephalomyopathy, fatal infantile, due to cytochrome c oxidase deficiency 2, 615119 Y-Autosomal recessive; Leigh syndrome due to cytochrome c oxidase deficiency, 256000 Y-Mitochondrial, Autosomal recessive	603646	AR	yes	yes	yes	yes
ENSG00000203667	COX20	OXPHOS subunits, assembly factors, and electron carriers	CIV assembly factors	no	AR	272	yes	yes	116228	Mitochondrial complex IV deficiency	220110	AR	yes	yes	yes	yes
ENSG00000131143	COX4I1	OXPHOS subunits, assembly factors, and electron carriers	CIV subunits	no	AR	272	yes	no	.	.	.	.	yes	yes	yes	yes
ENSG00000131055	COX4I2	OXPHOS subunits, assembly factors, and electron carriers	CIV subunits	no	AR	272	yes	yes	84701	Exocrine pancreatic insufficiency, dyserythropoietic anemia, and calvarial hyperostosis, 612714 Y-Autosomal recessive	607976	AR	yes	yes	yes	yes
ENSG00000178741	COX5A	OXPHOS subunits, assembly factors, and electron carriers	CIV subunits	no	AR	272	yes	no	.	.	.	.	yes	yes	yes	yes
ENSG00000111775	COX6A1	OXPHOS subunits, assembly factors, and electron carriers	CIV subunits	no	AR	272	yes	yes	1337	Charcot-Marie-Tooth disease, recessive intermediate D, 616039 Y-Autosomal recessive	602072	AR	yes	yes	yes	yes
ENSG00000156885	COX6A2	OXPHOS subunits, assembly factors, and electron carriers	CIV subunits	no	AR	413	yes	yes	1339	Mitochondrial complex IV deficiency	220110	AR	yes	yes	no	no
ENSG00000126267	COX6B1	OXPHOS subunits, assembly factors, and electron carriers	CIV subunits	no	AR	272	yes	yes	1340	Mitochondrial complex IV deficiency	220110	AR	yes	yes	yes	yes
ENSG00000131174	COX7B	OXPHOS subunits, assembly factors, and electron carriers	CIV subunits	no	XLD	272	yes	yes	1349	Linear skin defects with multiple congenital anomalies 2, 300887 Y-X-linked dominant	300885	XLD	yes	yes	yes	yes
ENSG00000176340	COX8A	OXPHOS subunits, assembly factors, and electron carriers	CIV subunits	no	AR	272	yes	yes	1351	?Mitochondrial complex IV deficiency	220110	AR	yes	yes	yes	yes
ENSG00000110090	CPT1A	Metabolism of substrates	Fatty acid oxidation	no	AR	413	yes	yes	1374	CPT deficiency, hepatic, type IA, 255120 Y-Autosomal recessive	600528	AR	yes	no	no	no
ENSG00000157184	CPT2	Metabolism of substrates	Fatty acid oxidation	no	AR/AD	413	yes	yes	1376	CPT II deficiency, myopathic, stress-induced, 255110 Y-Autosomal dominant, Autosomal recessive; CPT II deficiency, infantile, 600649 Y-Autosomal recessive; CPT II deficiency, lethal neonatal, 608836 Y-Autosomal recessive; {Encephalopathy, acute, infection-induced, 4, susceptibility to}, 614212 Y-Autosomal dominant, Autosomal recessive	600650	AR+AD	yes	no	no	no
ENSG00000095321	CRAT	Metabolism of substrates	Fatty acid oxidation	no	AR	413	yes	yes	1384	?Neurodegeneration with brain iron accumulation 8, 617917 Y-Autosomal recessive	600184	AR	no	yes	no	no
ENSG00000159692	CTBP1	Others / Unknown function	Others / Unknown function	no	AD	413	no	yes	1487	Hypotonia, ataxia, developmental delay, and tooth enamel defect syndrome, 617915 Y-Autosomal dominant	602618	AD	no	yes	no	yes
ENSG00000179091	CYC1	OXPHOS subunits, assembly factors, and electron carriers	CIII subunits	no	AR	272	yes	yes	1537	Mitochondrial complex III deficiency, nuclear type 6, 615453 Y-Autosomal recessive	123980	AR	yes	yes	yes	yes
ENSG00000172115	CYCS	Metabolism of cofactors / OXPHOS subunits, assembly factors, and electron carriers	Haem biosynthesis / Cytochrome C	yes	AD	272	yes	yes	54205	Thrombocytopenia 4, 612004 Y-Autosomal dominant	123970	AD	yes	yes	yes	yes
ENSG00000019186	CYP24A1	Mitochondrial dynamics, homeostasis, and quality control	Ca2+ homoeostasis	no	AR	413	yes	yes	1591	Hypercalcemia, infantile, 1, 143880 Y-Autosomal recessive	126065	AR	no	yes	no	no
ENSG00000180902	D2HGDH	Metabolism of toxic compounds	Metabolism of toxic compounds	no	AR	413	yes	yes	728294	D-2-hydroxyglutaric aciduria, 600721 Y-Autosomal recessive	609186	AR	yes	no	yes	yes
ENSG00000117593	DARS2	Mitochondrial DNA replication and expression	Mitochondrial tRNA synthetases	no	AR	272	yes	yes	55157	Leukoencephalopathy with brain stem and spinal cord involvement and lactate elevation, 611105 Y-Autosomal recessive	610956	AR	yes	yes	yes	yes
ENSG00000187323	DCC	Others / Unknown function	Others / Unknown function	no	AR/AD	413	no	yes	1630	Esophageal carcinoma, somatic, 133239 (3); Gaze palsy, familial horizontal, with progressive scoliosis, 2, 617542 Y-Autosomal recessive; Mirror movements 1 and/or agenesis of the corpus callosum, 157600 Y-Autosomal dominant; Colorectal cancer, somatic, 114500 (3)	120470	AR+AD	no	yes	no	no
ENSG00000114956	DGUOK	Mitochondrial DNA replication and expression	Nucleotide pool maintenance	no	AR	272	yes	yes	1716	Progressive external ophthalmoplegia with mitochondrial DNA deletions, autosomal recessive 4, 617070 Y-Autosomal recessive; Portal hypertension, noncirrhotic, 617068 Y-Autosomal recessive; Mitochondrial DNA depletion syndrome 3 (hepatocerebral type), 251880 Y-Autosomal recessive	601465	AR	yes	yes	yes	yes
ENSG00000184047	DIABLO	Mitochondrial dynamics, homeostasis, and quality control	Apoptosis defect	no	AD	413	yes	yes	56616	Deafness, autosomal dominant 64, 614152 Y-Autosomal dominant	605219	AD	no	yes	no	no
ENSG00000131504	DIAPH1	Others / Unknown function	Others / Unknown function	no	AR/AD	413	no	yes	1729	Seizures, cortical blindness, microcephaly syndrome, 616632 Y-Autosomal recessive; Deafness, autosomal dominant 1, 124900 Y-Autosomal dominant	602121	AR+AD	no	yes	no	no
ENSG00000150768	DLAT	Metabolism of substrates	Pyruvate metabolism	no	AR	272	yes	yes	1737	Pyruvate dehydrogenase E2 deficiency, 245348 Y-Autosomal recessive	608770	AR	yes	yes	yes	yes
ENSG00000091140	DLD	Metabolism of substrates / Metabolism of cofactors	Pyruvate metabolism / Lipoic acid biosynthesis	yes	AR	272	yes	yes	1738	Dihydrolipoamide dehydrogenase deficiency, 246900 Y-Autosomal recessive	238331	AR	yes	yes	yes	yes
ENSG00000119689	DLST	Metabolism of substrates	Tricarboxylic acid cycle enzymes	no	AD	413	yes	yes	1743	Paragangliomas 7, 618475 Y-Autosomal dominant	126063	AD	yes	yes	no	no
ENSG00000138346	DNA2	Mitochondrial DNA replication and expression	Replication, maintenance, and transcription	no	AD	272	yes	yes	1763	Progressive external ophthalmoplegia with mitochondrial DNA deletions, autosomal dominant 6, 615156 Y-Autosomal dominant; ?Seckel syndrome 8, 615807 Y-Autosomal recessive	601810	AR+AD	yes	yes	yes	yes
ENSG00000205981	DNAJC19	Mitochondrial dynamics, homeostasis, and quality control	Mitochondrial membrane phospholipid and import machinery	no	AR	272	yes	yes	131118	3-methylglutaconic aciduria, type V, 610198 Y-Autosomal recessive	608977	AR	yes	yes	yes	yes
ENSG00000087470	DNM1L	Mitochondrial dynamics, homeostasis, and quality control	Fission	no	AR/AD	272	yes	yes	10059	Encephalopathy, lethal, due to defective mitochondrial peroxisomal fission 1, 614388 Y-Autosomal dominant, Autosomal recessive; Optic atrophy 5, 610708 Y-Autosomal dominant	603850	AD	yes	yes	yes	yes
ENSG00000103356	EARS2	Mitochondrial DNA replication and expression	Mitochondrial tRNA synthetases	no	AR	272	yes	yes	124454	Combined oxidative phosphorylation deficiency 12, 614924 Y-Autosomal recessive	612799	AR	yes	yes	yes	yes
ENSG00000127884	ECHS1	Metabolism of toxic compounds	Metabolism of toxic compounds	no	AR	272	yes	yes	1892	Mitochondrial short-chain enoyl-CoA hydratase 1 deficiency, 616277 Y-Autosomal recessive	602292	AR	yes	yes	yes	yes
ENSG00000130159	ECSIT	OXPHOS subunits, assembly factors, and electron carriers	CI assembly factors	no	AR	413	yes	no	.	.	.	.	no	yes	no	no
ENSG00000006744	ELAC2	Mitochondrial DNA replication and expression	RNA processing	no	AR	272	yes	yes	60528	Combined oxidative phosphorylation deficiency 17, 615440 Y-Autosomal recessive; {Prostate cancer, hereditary, 2, susceptibility to}, 614731 (3)	605367	AR	yes	yes	yes	yes
ENSG00000127463	EMC1	Others / Unknown function	Others / Unknown function	no	AR	413	no	yes	23065	Cerebellar atrophy, visual impairment, and psychomotor retardation, 616875 Y-Autosomal recessive	616846	AR	no	yes	no	no
ENSG00000132591	ERAL1	Mitochondrial DNA replication and expression	RNA processing	no	AR	272	yes	yes	26284	Perrault syndrome 6, 617565 Y-Autosomal recessive	607435	AR	yes	yes	yes	yes
ENSG00000140374	ETFA	Metabolism of substrates	Fatty acid oxidation	no	AR	413	yes	yes	2108	Glutaric acidemia IIA, 231680 Y-Autosomal recessive	608053	AR	yes	yes	no	no
ENSG00000105379	ETFB	Metabolism of substrates	Fatty acid oxidation	no	AR	413	yes	yes	2109	Glutaric acidemia IIB, 231680 Y-Autosomal recessive	130410	AR	yes	yes	no	no
ENSG00000171503	ETFDH	Metabolism of substrates	Fatty acid oxidation	no	AR	413	yes	yes	2110	Glutaric acidemia IIC, 231680 Y-Autosomal recessive	231675	AR	yes	yes	no	no
ENSG00000105755	ETHE1	Metabolism of toxic compounds	Metabolism of toxic compounds	no	AR	272	yes	yes	23474	Ethylmalonic encephalopathy, 602473 Y-Autosomal recessive	608451	AR	yes	yes	yes	yes
ENSG00000107371	EXOSC3	Others / Unknown function	Others / Unknown function	no	AR	413	no	yes	51010	Pontocerebellar hypoplasia, type 1B, 614678 Y-Autosomal recessive	606489	AR	no	no	no	yes
ENSG00000103089	FA2H	Metabolism of substrates	Fatty acid oxidation	no	AR	413	no	yes	79152	Spastic paraplegia 35, autosomal recessive, 612319 Y-Autosomal recessive	611026	AR	no	yes	no	no
ENSG00000145982	FARS2	Mitochondrial DNA replication and expression	Mitochondrial tRNA synthetases	no	AR	272	yes	yes	10667	Spastic paraplegia 77, autosomal recessive, 617046 Y-Autosomal recessive; Combined oxidative phosphorylation deficiency 14, 614946 Y-Autosomal recessive	611592	AR	yes	yes	yes	yes
ENSG00000118246	FASTKD2	OXPHOS subunits, assembly factors, and electron carriers	CIV assembly factors	no	AR	272	yes	yes	22868	Combined oxidative phosphorylation deficiency 44	618855	AR	yes	yes	yes	yes
ENSG00000112234	FBXL4	Others / Unknown function	Others / Unknown function	no	AR	272	yes	yes	26235	Mitochondrial DNA depletion syndrome 13 (encephalomyopathic type), 615471 Y-Autosomal recessive	605654	AR	yes	yes	yes	yes
ENSG00000267673	FDX1L	Metabolism of cofactors	Iron–sulphur cluster protein biosynthesis	no	AR	272	yes	yes	112812	Mitochondrial myopathy, episodic, with optic atrophy and reversible leukoencephalopathy, 251900 Y-Autosomal recessive	614585	AR	yes	yes	yes	yes
ENSG00000161513	FDXR	Metabolism of cofactors	Iron–sulphur cluster protein biosynthesis	no	AR	272	yes	yes	2232	Auditory neuropathy and optic atrophy, 617717 Y-Autosomal recessive	103270	AR	yes	yes	yes	yes
ENSG00000114279	FGF12	Others / Unknown function	Others / Unknown function	no	AD	413	no	yes	2257	Epileptic encephalopathy, early infantile, 47, 617166 Y-Autosomal dominant	601513	AD	no	yes	no	no
ENSG00000091483	FH	Metabolism of substrates	Tricarboxylic acid cycle enzymes	no	AR	272	yes	yes	2271	Fumarase deficiency, 606812 Y-Autosomal recessive; Leiomyomatosis and renal cell cancer, 150800 Y-Autosomal dominant	136850	AR+AD	yes	yes	yes	yes
ENSG00000160688	FLAD1	Metabolism of cofactors	Riboflavin metabolism and transport	no	AR	272	yes	yes	80308	Lipid storage myopathy due to flavin adenine dinucleotide synthetase deficiency, 255100 Y-Autosomal recessive	610595	AR	yes	yes	yes	yes
ENSG00000110074	FOXRED1	OXPHOS subunits, assembly factors, and electron carriers	CI assembly factors	no	AR	272	yes	yes	55572	Mitochondrial complex I deficiency, nuclear type 19, 618241 Y-Autosomal recessive	613622	AR	yes	yes	yes	yes
ENSG00000165060	FXN	Metabolism of cofactors	Iron–sulphur cluster protein biosynthesis	no	AR	272	yes	yes	2395	Friedreich ataxia with retained reflexes, 229300 Y-Autosomal recessive; Friedreich ataxia, 229300 Y-Autosomal recessive	606829	AR	yes	yes	yes	yes
ENSG00000106105	GARS	Mitochondrial DNA replication and expression	Mitochondrial tRNA synthetases	no	AR	272	yes	yes	2617	Charcot-Marie-Tooth disease, type 2D, 601472 Y-Autosomal dominant; Neuronopathy, distal hereditary motor, type VA, 600794 Y-Autosomal dominant	600287	AD	yes	yes	yes	yes
ENSG00000059691	GATB	Mitochondrial DNA replication and expression	Mitochondrial tRNA synthetases	no	AR	413	yes	yes	5188	?Combined oxidative phosphorylation deficiency 41	618838	AR	yes	yes	no	yes
ENSG00000257218	GATC	Mitochondrial DNA replication and expression	Mitochondrial tRNA synthetases	no	AR	413	yes	yes	283459	Combined oxidative phosphorylation deficiency 42	618839	AR	yes	yes	no	yes
ENSG00000104381	GDAP1	Mitochondrial dynamics, homeostasis, and quality control	Fission	no	AR/AD	272	yes	yes	54332	Charcot-Marie-Tooth disease, recessive intermediate, A, 608340 Y-Autosomal recessive; Charcot-Marie-Tooth disease, type 4A, 214400 Y-Autosomal recessive; Charcot-Marie-Tooth disease, axonal, type 2K, 607831 Y-Autosomal dominant, Autosomal recessive; Charcot-Marie-Tooth disease, axonal, with vocal cord paresis, 607706 Y-Autosomal recessive	606598	AR+AD	yes	yes	yes	yes
ENSG00000127554	GFER	Mitochondrial dynamics, homeostasis, and quality control	Mitochondrial membrane phospholipid and import machinery	no	AR	272	yes	no	.	Myopathy, mitochondrial progressive, with congenital cataract, hearing loss, and developmental delay	.	.	yes	yes	yes	yes
ENSG00000168827	GFM1	Mitochondrial DNA replication and expression	Translation regulation	no	AR	272	yes	yes	85476	Combined oxidative phosphorylation deficiency 1, 609060 Y-Autosomal recessive	606639	AR	yes	yes	yes	yes
ENSG00000164347	GFM2	Mitochondrial DNA replication and expression	Translation regulation	no	AR	272	yes	yes	84340	Combined oxidative phosphorylation deficiency 39, 618397 Y-Autosomal recessive	606544	AR	yes	yes	yes	yes
ENSG00000182512	GLRX5	Metabolism of cofactors	Iron–sulphur cluster protein biosynthesis	no	AR	272	yes	yes	51218	Anemia, sideroblastic, 3, pyridoxine-refractory, 616860 Y-Autosomal recessive; Spasticity, childhood-onset, with hyperglycinemia, 616859 Y-Autosomal recessive	609588	AR	yes	yes	yes	yes
ENSG00000125166	GOT2	Metabolism of substrates	Redox carriers	no	AR	413	yes	yes	2806	Epileptic encephalopathy, early infantile, 82, 618721 Y-Autosomal recessive	138150	AR	yes	yes	no	no
ENSG00000130299	GTPBP3	Mitochondrial DNA replication and expression	RNA processing	no	AR	272	yes	yes	84705	Combined oxidative phosphorylation deficiency 23, 616198 Y-Autosomal recessive	608536	AR	yes	yes	yes	yes
ENSG00000151806	GUF1	Mitochondrial DNA replication and expression	Translation regulation	no	AR	413	yes	yes	60558	?Epileptic encephalopathy, early infantile, 40, 617065 Y-Autosomal recessive	617064	AR	yes	yes	no	no
ENSG00000162882	HAAO	Metabolism of cofactors	NADPH metabolism	no	AR	413	no	yes	23498	Vertebral, cardiac, renal, and limb defects syndrome 1, 617660 Y-Autosomal recessive	604521	AR	no	no	yes	yes
ENSG00000138796	HADH	Metabolism of substrates	Fatty acid oxidation	no	AR	413	yes	yes	3033	3-hydroxyacyl-CoA dehydrogenase deficiency, 231530 Y-Autosomal recessive; Hyperinsulinemic hypoglycemia, familial, 4, 609975 Y-Autosomal recessive	601609	AR	yes	no	no	no
ENSG00000084754	HADHA	Metabolism of substrates	Fatty acid oxidation	no	AR	413	yes	yes	3030	LCHAD deficiency, 609016 Y-Autosomal recessive; HELLP syndrome, maternal, of pregnancy, 609016 Y-Autosomal recessive; Fatty liver, acute, of pregnancy, 609016 Y-Autosomal recessive; Trifunctional protein deficiency, 609015 Y-Autosomal recessive	600890	AR	yes	no	no	no
ENSG00000138029	HADHB	Metabolism of substrates	Fatty acid oxidation	no	AR	413	yes	yes	3032	Trifunctional protein deficiency, 609015 Y-Autosomal recessive	143450	AR	yes	no	no	no
ENSG00000112855	HARS2	Mitochondrial DNA replication and expression	Mitochondrial tRNA synthetases	no	AR	272	yes	yes	23438	?Perrault syndrome 2, 614926 Y-Autosomal recessive	600783	AR	yes	yes	yes	yes
ENSG00000004961	HCCS	Metabolism of cofactors / OXPHOS subunits, assembly factors, and electron carriers	Haem biosynthesis / Cytochrome C	yes	XLD	272	yes	yes	3052	Linear skin defects with multiple congenital anomalies 1, 309801 Y-X-linked dominant	300056	XLD	yes	yes	yes	yes
ENSG00000198130	HIBCH	Metabolism of toxic compounds	Metabolism of toxic compounds	no	AR	272	yes	yes	26275	3-hydroxyisobutryl-CoA hydrolase deficiency, 250620 Y-Autosomal recessive	610690	AR	yes	yes	yes	yes
ENSG00000159267	HLCS	Metabolism of cofactors	Biotin metabolism	no	AR	413	no	yes	3141	Holocarboxylase synthetase deficiency, 253270 Y-Autosomal recessive	609018	AR	yes	yes	no	yes
ENSG00000117305	HMGCL	Metabolism of substrates	Ketone bodies	no	AR	413	yes	yes	3155	HMG-CoA lyase deficiency, 246450 Y-Autosomal recessive	613898	AR	yes	no	no	no
ENSG00000134240	HMGCS2	Metabolism of substrates	Ketone bodies	no	AR	413	yes	yes	3158	HMG-CoA synthase-2 deficiency, 605911 Y-Autosomal recessive	600234	AR	yes	no	no	no
ENSG00000072506	HSD17B10	Mitochondrial DNA replication and expression	RNA processing	no	XLD	272	yes	yes	3028	HSD10 mitochondrial disease, 300438 Y-X-linked dominant	300256	XLD	yes	yes	yes	yes
ENSG00000113013	HSPA9	Mitochondrial dynamics, homeostasis, and quality control	Mitochondrial protein quality control	no	AR/AD	413	yes	yes	3313	Even-plus syndrome, 616854 Y-Autosomal recessive; Anemia, sideroblastic, 4, 182170 Y-Autosomal dominant	600548	AR+AD	no	yes	no	no
ENSG00000144381	HSPD1	Mitochondrial dynamics, homeostasis, and quality control	Mitochondrial protein quality control	no	AR/AD	272	yes	yes	3329	Spastic paraplegia 13, autosomal dominant, 605280 Y-Autosomal dominant; Leukodystrophy, hypomyelinating, 4, 612233 Y-Autosomal recessive	118190	AR+AD	yes	yes	yes	yes
ENSG00000115541	HSPE1	Mitochondrial dynamics, homeostasis, and quality control	Mitochondrial protein quality control	no	AD	413	yes	no	.	.	.	.	no	yes	no	no
ENSG00000115317	HTRA2	Mitochondrial dynamics, homeostasis, and quality control	Mitochondrial protein quality control	no	AR	272	yes	yes	27429	{Parkinson disease 13}, 610297 (3); 3-methylglutaconic aciduria, type VIII, 617248 Y-Autosomal recessive	606441	AR	yes	yes	yes	yes
ENSG00000197386	HTT	Metabolism of toxic compounds	Metabolism of toxic compounds	no	AR/AD	413	no	yes	3064	Huntington disease, 143100 Y-Autosomal dominant; Lopes-Maciel-Rodan syndrome, 617435 Y-Autosomal recessive	613004	AR+AD	yes	no	no	no
ENSG00000067704	IARS2	Mitochondrial DNA replication and expression	Mitochondrial tRNA synthetases	no	AR	272	yes	yes	55699	?Cataracts, growth hormone deficiency, sensory neuropathy, sensorineural hearing loss, and skeletal dysplasia, 616007 Y-Autosomal recessive	612801	AR	yes	yes	yes	yes
ENSG00000181873	IBA57	Metabolism of cofactors	Iron–sulphur cluster protein biosynthesis	no	AR	272	yes	yes	200205	?Spastic paraplegia 74, autosomal recessive, 616451 Y-Autosomal recessive; Multiple mitochondrial dysfunctions syndrome 3, 615330 Y-Autosomal recessive	615316	AR	yes	yes	yes	yes
ENSG00000182054	IDH2	Metabolism of toxic compounds	Metabolism of toxic compounds	no	AD	413	yes	no	.	D-2-hydroxyglutaric aciduria 2	.	.	yes	yes	no	no
ENSG00000166411	IDH3A	Metabolism of substrates	Tricarboxylic acid cycle enzymes	no	AR	272	yes	no	.	NA	.	.	yes	yes	yes	yes
ENSG00000101365	IDH3B	Metabolism of substrates	Tricarboxylic acid cycle enzymes	no	AR	272	yes	no	.	Retinitis pigmentosa 46	.	.	yes	yes	yes	yes
ENSG00000135070	ISCA1	Metabolism of cofactors	Iron–sulphur cluster protein biosynthesis	no	AR	413	yes	yes	81689	Multiple mitochondrial dysfunctions syndrome 5, 617613 Y-Autosomal recessive	611006	AR	yes	yes	no	yes
ENSG00000165898	ISCA2	Metabolism of cofactors	Iron–sulphur cluster protein biosynthesis	no	AR	272	yes	yes	122961	Multiple mitochondrial dysfunctions syndrome 4, 616370 Y-Autosomal recessive	615317	AR	yes	yes	yes	yes
ENSG00000136003	ISCU	Metabolism of cofactors	Iron–sulphur cluster protein biosynthesis	no	AR	272	yes	yes	23479	Myopathy with lactic acidosis, hereditary, 255125 Y-Autosomal recessive	611911	AR	yes	yes	yes	yes
ENSG00000065427	KARS	Mitochondrial DNA replication and expression	Mitochondrial tRNA synthetases	no	AR	272	yes	yes	3735	?Charcot-Marie-Tooth disease, recessive intermediate, B, 613641 Y-Autosomal recessive; Deafness, autosomal recessive 89, 613916 Y-Autosomal recessive	601421	AR	yes	yes	yes	yes
ENSG00000155980	KIF5A	Others / Unknown function	Others / Unknown function	no	AD	413	no	yes	3798	Myoclonus, intractable, neonatal, 617235 Y-Autosomal dominant; Spastic paraplegia 10, autosomal dominant, 604187 Y-Autosomal dominant; {Amyotrophic lateral sclerosis, susceptibility to, 25}, 617921 Y-Autosomal dominant	602821	AD	no	yes	no	no
ENSG00000115919	KYNU	Metabolism of cofactors	NADPH metabolism	no	AR	413	no	yes	8942	Vertebral, cardiac, renal, and limb defects syndrome 2, 617661 Y-Autosomal recessive; ?Hydroxykynureninuria, 236800 Y-Autosomal recessive	605197	AR	no	no	yes	yes
ENSG00000087299	L2HGDH	Metabolism of toxic compounds	Metabolism of toxic compounds	no	AR	413	yes	yes	79944	L-2-hydroxyglutaric aciduria, 236792 Y-Autosomal recessive	609584	AR	yes	no	yes	yes
ENSG00000011376	LARS2	Mitochondrial DNA replication and expression	Mitochondrial tRNA synthetases	no	AR	272	yes	yes	23395	Perrault syndrome 4, 615300 Y-Autosomal recessive; ?Hydrops, lactic acidosis, and sideroblastic anemia, 617021 Y-Autosomal recessive	604544	AR	yes	yes	yes	yes
ENSG00000121897	LIAS	Metabolism of cofactors	Lipoic acid biosynthesis	no	AR	272	yes	yes	11019	Hyperglycinemia, lactic acidosis, and seizures, 614462 Y-Autosomal recessive	607031	AR	yes	yes	yes	yes
ENSG00000144182	LIPT1	Metabolism of cofactors	Lipoic acid biosynthesis	no	AR	272	yes	yes	51601	Lipoyltransferase 1 deficiency, 616299 Y-Autosomal recessive	610284	AR	yes	yes	yes	yes
ENSG00000175536	LIPT2	Metabolism of cofactors	Lipoic acid biosynthesis	no	AR	272	yes	yes	387787	Encephalopathy, neonatal severe, with lactic acidosis and brain abnormalities, 617668 Y-Autosomal recessive	617659	AR	yes	yes	yes	yes
ENSG00000196365	LONP1	Mitochondrial dynamics, homeostasis, and quality control	Mitochondrial protein quality control	no	AR	272	yes	yes	9361	CODAS syndrome, 600373 Y-Autosomal recessive	605490	AR	yes	yes	yes	yes
ENSG00000138095	LRPPRC	Mitochondrial DNA replication and expression	RNA processing	no	AR	272	yes	yes	10128	Leigh syndrome, French-Canadian type, 220111 Y-Autosomal recessive	607544	AR	yes	yes	yes	yes
ENSG00000214113	LYRM4	Metabolism of cofactors	Iron–sulphur cluster protein biosynthesis	no	AR	272	yes	yes	57128	?Combined oxidative phosphorylation deficiency 19, 615595 Y-Autosomal recessive	613311	AR	yes	yes	yes	yes
ENSG00000186687	LYRM7	OXPHOS subunits, assembly factors, and electron carriers	CIII assembly factors	no	AR	272	yes	yes	90624	Mitochondrial complex III deficiency, nuclear type 8, 615838 Y-Autosomal recessive	615831	AR	yes	yes	yes	yes
ENSG00000247626	MARS2	Mitochondrial DNA replication and expression	Mitochondrial tRNA synthetases	no	AR	272	yes	yes	92935	Spastic ataxia 3, autosomal recessive, 611390 Y-Autosomal recessive; ?Combined oxidative phosphorylation deficiency 25, 616430 Y-Autosomal recessive	609728	AR	yes	yes	yes	yes
ENSG00000100294	MCAT	Metabolism of cofactors	Lipoic acid biosynthesis	no	AR	413	yes	no	.	.	.	.	yes	no	no	no
ENSG00000014641	MDH1	Metabolism of substrates	Redox carriers	no	AR	413	yes	no	.	.	.	.	yes	no	no	no
ENSG00000146701	MDH2	Metabolism of substrates	Tricarboxylic acid cycle enzymes	no	AR	272	yes	yes	4191	Epileptic encephalopathy, early infantile, 51, 617339 Y-Autosomal recessive	154100	AR	yes	yes	yes	yes
ENSG00000116353	MECR	Metabolism of cofactors	Lipoic acid biosynthesis	no	AR	272	yes	yes	51102	Dystonia, childhood-onset, with optic atrophy and basal ganglia abnormalities, 617282 Y-Autosomal recessive	608205	AR	yes	yes	yes	yes
ENSG00000168958	MFF	Mitochondrial dynamics, homeostasis, and quality control	Fission	no	AR	272	yes	yes	56947	Encephalopathy due to defective mitochondrial and peroxisomal fission 2, 617086 Y-Autosomal recessive	614785	AR	yes	yes	yes	yes
ENSG00000116688	MFN2	Mitochondrial dynamics, homeostasis, and quality control	Fusion	no	AR/AD	272	yes	yes	9927	Hereditary motor and sensory neuropathy VIA, 601152 Y-Autosomal dominant; Charcot-Marie-Tooth disease, axonal, type 2A2B, 617087 Y-Autosomal recessive; Charcot-Marie-Tooth disease, axonal, type 2A2A, 609260 Y-Autosomal dominant	608507	AR+AD	yes	yes	yes	yes
ENSG00000125871	MGME1	Mitochondrial DNA replication and expression	Replication, maintenance, and transcription	no	AR	272	yes	yes	92667	Mitochondrial DNA depletion syndrome 11, 615084 Y-Autosomal recessive	615076	AR	yes	yes	yes	yes
ENSG00000107745	MICU1	Mitochondrial dynamics, homeostasis, and quality control	Ca2+ homoeostasis	no	AR	272	yes	yes	10367	Myopathy with extrapyramidal signs, 615673 Y-Autosomal recessive	605084	AR	yes	yes	yes	yes
ENSG00000165487	MICU2	Mitochondrial dynamics, homeostasis, and quality control	Ca2+ homoeostasis	no	AR	272	yes	no	.	.	.	.	yes	yes	yes	yes
ENSG00000177427	MIEF2	Mitochondrial dynamics, homeostasis, and quality control	Morphology	no	AR	413	no	no	.	.	.	.	yes	yes	no	yes
ENSG00000027001	MIPEP	Mitochondrial dynamics, homeostasis, and quality control	Mitochondrial protein quality control	no	AR	272	yes	yes	4285	Combined oxidative phosphorylation deficiency 31, 617228 Y-Autosomal recessive	602241	AR	yes	yes	yes	yes
ENSG00000060762	MPC1	Metabolism of substrates	Mitochondrial carriers	no	AR	272	yes	yes	51660	Mitochondrial pyruvate carrier deficiency, 614741 Y-Autosomal recessive	614738	AR	yes	yes	yes	yes
ENSG00000115204	MPV17	Others / Unknown function	Others / Unknown function	no	AR	272	yes	yes	4358	Charcot-Marie-Tooth disease, axonal, type 2EE, 618400 Y-Autosomal recessive; Mitochondrial DNA depletion syndrome 6 (hepatocerebral type), 256810 Y-Autosomal recessive	137960	AR	yes	yes	yes	yes
ENSG00000122687	MRM2	Mitochondrial DNA replication and expression	RNA processing	no	AR	272	yes	yes	29960	?Mitochondrial DNA depletion syndrome 17, 618567 Y-Autosomal recessive	606906	AR	yes	yes	yes	yes
ENSG00000262814	MRPL12	Mitochondrial DNA replication and expression	Mitochondrial ribosomes	no	AR	272	yes	yes	6182	?Combined oxidative phosphorylation deficiency 45	602375	AR	yes	yes	yes	yes
ENSG00000143314	MRPL24	Mitochondrial DNA replication and expression	Mitochondrial ribosomes	no	Unknown	413	yes	no	.	.	.	.	yes	no	no	no
ENSG00000114686	MRPL3	Mitochondrial DNA replication and expression	Mitochondrial ribosomes	no	AR	272	yes	yes	11222	Combined oxidative phosphorylation deficiency 9, 614582 Y-Autosomal recessive	607118	AR	yes	yes	yes	yes
ENSG00000135900	MRPL44	Mitochondrial DNA replication and expression	Mitochondrial ribosomes	no	AR	272	yes	yes	65080	?Combined oxidative phosphorylation deficiency 16, 615395 Y-Autosomal recessive	611849	AR	yes	yes	yes	yes
ENSG00000120333	MRPS14	Mitochondrial DNA replication and expression	Mitochondrial ribosomes	no	AR	413	yes	yes	63931	?Combined oxidative phosphorylation deficiency 38, 618378 Y-Autosomal recessive	611978	AR	yes	yes	no	no
ENSG00000182180	MRPS16	Mitochondrial DNA replication and expression	Mitochondrial ribosomes	no	AR	272	yes	yes	51021	Combined oxidative phosphorylation deficiency 2, 610498 Y-Autosomal recessive	609204	AR	yes	yes	yes	yes
ENSG00000122140	MRPS2	Mitochondrial DNA replication and expression	Mitochondrial ribosomes	no	AR	413	yes	yes	51116	Combined oxidative phosphorylation deficiency 36, 617950 Y-Autosomal recessive	611971	AR	yes	yes	no	yes
ENSG00000175110	MRPS22	Mitochondrial DNA replication and expression	Mitochondrial ribosomes	no	AR	272	yes	yes	56945	Combined oxidative phosphorylation deficiency 5, 611719 Y-Autosomal recessive; Ovarian dysgenesis 7, 618117 Y-Autosomal recessive	605810	AR	yes	yes	yes	yes
ENSG00000181610	MRPS23	Mitochondrial DNA replication and expression	Mitochondrial ribosomes	no	AR	272	yes	yes	51649	?Combined oxidative phosphorylation defiency 46	611985	AR	yes	yes	yes	yes
ENSG00000131368	MRPS25	Mitochondrial DNA replication and expression	Mitochondrial ribosomes	no	AR	413	yes	no	.	.	.	.	yes	yes	no	no
ENSG00000147586	MRPS28	Mitochondrial DNA replication and expression	Mitochondrial ribosomes	no	AR	413	yes	yes	28957	?Combined oxidative phosphorylation deficiency 47	611990	AR	yes	yes	no	yes
ENSG00000074071	MRPS34	Mitochondrial DNA replication and expression	Mitochondrial ribosomes	no	AR	272	yes	yes	65993	Combined oxidative phosphorylation deficiency 32, 617664 Y-Autosomal recessive	611994	AR	yes	yes	yes	yes
ENSG00000125445	MRPS7	Mitochondrial DNA replication and expression	Mitochondrial ribosomes	no	AR	272	yes	yes	51081	?Combined oxidative phosphorylation deficiency 34, 617872 Y-Autosomal recessive	611974	AR	yes	yes	yes	yes
ENSG00000125459	MSTO1	Mitochondrial dynamics, homeostasis, and quality control	Morphology	no	AR/AD	272	no	yes	55154	Myopathy, mitochondrial, and ataxia, 617675 Y-Autosomal dominant, Autosomal recessive	617619	AD	yes	yes	yes	yes
ENSG00000198899	MT-ATP6	OXPHOS subunits, assembly factors, and electron carriers	CV subunits	no	M	272	yes	mtDNA	4508	.	.	.	yes	yes	yes	yes
ENSG00000228253	MT-ATP8	OXPHOS subunits, assembly factors, and electron carriers	CV subunits	no	M	272	yes	mtDNA	4509	.	.	.	yes	yes	yes	yes
ENSG00000198804	MT-CO1	OXPHOS subunits, assembly factors, and electron carriers	CIV subunits	no	M	272	yes	mtDNA	4512	.	.	.	yes	yes	yes	yes
ENSG00000198712	MT-CO2	OXPHOS subunits, assembly factors, and electron carriers	CIV subunits	no	M	272	yes	mtDNA	4513	.	.	.	yes	yes	yes	yes
ENSG00000198938	MT-CO3	OXPHOS subunits, assembly factors, and electron carriers	CIV subunits	no	M	413	yes	mtDNA	4514	.	.	.	yes	yes	no	yes
ENSG00000198727	MT-CYB	OXPHOS subunits, assembly factors, and electron carriers	CIII subunits	no	M	272	yes	mtDNA	4519	.	.	.	yes	yes	yes	yes
ENSG00000198888	MT-ND1	OXPHOS subunits, assembly factors, and electron carriers	CI subunits	no	M	272	yes	mtDNA	4535	.	.	.	yes	yes	yes	yes
ENSG00000198763	MT-ND2	OXPHOS subunits, assembly factors, and electron carriers	CI subunits	no	M	272	yes	mtDNA	4536	.	.	.	yes	yes	yes	yes
ENSG00000198840	MT-ND3	OXPHOS subunits, assembly factors, and electron carriers	CI subunits	no	M	272	yes	mtDNA	4537	.	.	.	yes	yes	yes	yes
ENSG00000198886	MT-ND4	OXPHOS subunits, assembly factors, and electron carriers	CI subunits	no	M	272	yes	mtDNA	4538	.	.	.	yes	yes	yes	yes
ENSG00000212907	MT-ND4L	OXPHOS subunits, assembly factors, and electron carriers	CI subunits	no	M	272	yes	mtDNA	4539	.	.	.	yes	yes	yes	yes
ENSG00000198786	MT-ND5	OXPHOS subunits, assembly factors, and electron carriers	CI subunits	no	M	272	yes	mtDNA	4540	.	.	.	yes	yes	yes	yes
ENSG00000198695	MT-ND6	OXPHOS subunits, assembly factors, and electron carriers	CI subunits	no	M	272	yes	mtDNA	4541	.	.	.	yes	yes	yes	yes
ENSG00000211459	MT-RNR1	Mitochondrial DNA replication and expression	Mitochondrial ribosomes	no	M	272	mt-rRNA	mtDNA	4549	.	.	.	yes	yes	yes	yes
ENSG00000210082	MT-RNR2	Mitochondrial DNA replication and expression	Mitochondrial ribosomes	no	M	413	mt-rRNA	no	.	.	.	.	no	yes	no	no
ENSG00000210127	MT-TA	Mitochondrial DNA replication and expression	Mitochondrial tRNAs	no	M	272	mt-tRNA	mtDNA	4553	.	.	.	yes	yes	yes	yes
ENSG00000210140	MT-TC	Mitochondrial DNA replication and expression	Mitochondrial tRNAs	no	M	272	mt-tRNA	mtDNA	4511	.	.	.	yes	yes	yes	yes
ENSG00000210154	MT-TD	Mitochondrial DNA replication and expression	Mitochondrial tRNAs	no	M	272	mt-tRNA	mtDNA	4555	.	.	.	yes	yes	yes	yes
ENSG00000210194	MT-TE	Mitochondrial DNA replication and expression	Mitochondrial tRNAs	no	M	272	mt-tRNA	mtDNA	4556	.	.	.	yes	yes	yes	yes
ENSG00000210049	MT-TF	Mitochondrial DNA replication and expression	Mitochondrial tRNAs	no	M	272	mt-tRNA	mtDNA	4558	.	.	.	yes	yes	yes	yes
ENSG00000210164	MT-TG	Mitochondrial DNA replication and expression	Mitochondrial tRNAs	no	M	272	mt-tRNA	mtDNA	4563	.	.	.	yes	yes	yes	yes
ENSG00000210176	MT-TH	Mitochondrial DNA replication and expression	Mitochondrial tRNAs	no	M	272	mt-tRNA	mtDNA	4564	.	.	.	yes	yes	yes	yes
ENSG00000210100	MT-TI	Mitochondrial DNA replication and expression	Mitochondrial tRNAs	no	M	272	mt-tRNA	mtDNA	4565	.	.	.	yes	yes	yes	yes
ENSG00000210156	MT-TK	Mitochondrial DNA replication and expression	Mitochondrial tRNAs	no	M	272	mt-tRNA	mtDNA	4566	.	.	.	yes	yes	yes	yes
ENSG00000209082	MT-TL1	Mitochondrial DNA replication and expression	Mitochondrial tRNAs	no	M	272	mt-tRNA	mtDNA	4567	.	.	.	yes	yes	yes	yes
ENSG00000210191	MT-TL2	Mitochondrial DNA replication and expression	Mitochondrial tRNAs	no	M	272	mt-tRNA	mtDNA	4568	.	.	.	yes	yes	yes	yes
ENSG00000210112	MT-TM	Mitochondrial DNA replication and expression	Mitochondrial tRNAs	no	M	272	mt-tRNA	mtDNA	4569	.	.	.	yes	yes	yes	yes
ENSG00000210135	MT-TN	Mitochondrial DNA replication and expression	Mitochondrial tRNAs	no	M	272	mt-tRNA	mtDNA	4570	.	.	.	yes	yes	yes	yes
ENSG00000210196	MT-TP	Mitochondrial DNA replication and expression	Mitochondrial tRNAs	no	M	272	mt-tRNA	mtDNA	4571	.	.	.	yes	yes	yes	yes
ENSG00000210107	MT-TQ	Mitochondrial DNA replication and expression	Mitochondrial tRNAs	no	M	272	mt-tRNA	mtDNA	4572	.	.	.	yes	yes	yes	yes
ENSG00000210174	MT-TR	Mitochondrial DNA replication and expression	Mitochondrial tRNAs	no	M	272	mt-tRNA	mtDNA	4573	.	.	.	yes	yes	yes	yes
ENSG00000210151	MT-TS1	Mitochondrial DNA replication and expression	Mitochondrial tRNAs	no	M	272	mt-tRNA	mtDNA	4574	.	.	.	yes	yes	yes	yes
ENSG00000210184	MT-TS2	Mitochondrial DNA replication and expression	Mitochondrial tRNAs	no	M	272	mt-tRNA	mtDNA	4575	.	.	.	yes	yes	yes	yes
ENSG00000210195	MT-TT	Mitochondrial DNA replication and expression	Mitochondrial tRNAs	no	M	272	mt-tRNA	mtDNA	4576	.	.	.	yes	yes	yes	yes
ENSG00000210077	MT-TV	Mitochondrial DNA replication and expression	Mitochondrial tRNAs	no	M	272	mt-tRNA	mtDNA	4577	.	.	.	yes	yes	yes	yes
ENSG00000210117	MT-TW	Mitochondrial DNA replication and expression	Mitochondrial tRNAs	no	M	272	mt-tRNA	mtDNA	4578	.	.	.	yes	yes	yes	yes
ENSG00000210144	MT-TY	Mitochondrial DNA replication and expression	Mitochondrial tRNAs	no	M	272	mt-tRNA	mtDNA	4579	.	.	.	yes	yes	yes	yes
ENSG00000103707	MTFMT	Mitochondrial DNA replication and expression	Mitochondrial tRNA synthetases	no	AR	272	yes	yes	123263	Combined oxidative phosphorylation deficiency 15, 614947 Y-Autosomal recessive; Mitochondrial complex I deficiency, nuclear type 27, 618248 Y-Autosomal recessive	611766	AR	yes	yes	yes	yes
ENSG00000135297	MTO1	Mitochondrial DNA replication and expression	RNA processing	no	AR	272	yes	yes	25821	Combined oxidative phosphorylation deficiency 10, 614702 Y-Autosomal recessive	614667	AR	yes	yes	yes	yes
ENSG00000107951	MTPAP	Mitochondrial DNA replication and expression	RNA processing	no	AR	272	yes	yes	55149	?Spastic ataxia 4, autosomal recessive, 613672 Y-Autosomal recessive	613669	AR	yes	yes	yes	yes
ENSG00000152620	NADK2	Metabolism of cofactors	NADPH metabolism	no	AR	272	yes	yes	133686	?2,4-dienoyl-CoA reductase deficiency, 616034 Y-Autosomal recessive	615787	AR	yes	yes	yes	yes
ENSG00000137513	NARS2	Mitochondrial DNA replication and expression	Mitochondrial tRNA synthetases	no	AR	272	yes	yes	79731	?Deafness, autosomal recessive 94, 618434 Y-Autosomal recessive; Combined oxidative phosphorylation deficiency 24, 616239 Y-Autosomal recessive	612803	AR	yes	yes	yes	yes
ENSG00000213995	NAXD	Metabolism of cofactors	NADPH metabolism	no	AR	413	yes	yes	55739	Encephalopathy, progressive, early-onset, with brain edema and/or leukoencephalopathy, 2, 618321 Y-Autosomal recessive	615910	AR	yes	yes	no	no
ENSG00000163382	NAXE	Metabolism of cofactors	NADPH metabolism	no	AR	272	yes	yes	128240	Encephalopathy, progressive, early-onset, with brain edema and/or leukoencephalopathy, 617186 Y-Autosomal recessive	608862	AR	yes	yes	yes	yes
ENSG00000125356	NDUFA1	OXPHOS subunits, assembly factors, and electron carriers	CI subunits	no	XLR	272	yes	yes	4694	Mitochondrial complex I deficiency, nuclear type 12, 301020 Y-X-linked recessive	300078	XLR	yes	yes	yes	yes
ENSG00000130414	NDUFA10	OXPHOS subunits, assembly factors, and electron carriers	CI subunits	no	AR	272	yes	yes	4705	Mitochondrial complex I deficiency, nuclear type 22, 618243 Y-Autosomal recessive	603835	AR	yes	yes	yes	yes
ENSG00000174886	NDUFA11	OXPHOS subunits, assembly factors, and electron carriers	CI assembly factors	no	AR	272	yes	yes	126328	Mitochondrial complex I deficiency, nuclear type 14, 618236 Y-Autosomal recessive	612638	AR	yes	yes	yes	yes
ENSG00000184752	NDUFA12	OXPHOS subunits, assembly factors, and electron carriers	CI subunits	no	AR	272	yes	yes	55967	?Mitochondrial complex I deficiency, nuclear type 23, 618244 Y-Autosomal recessive	614530	AR	yes	yes	yes	yes
ENSG00000186010	NDUFA13	OXPHOS subunits, assembly factors, and electron carriers	CI subunits	no	AR	272	yes	yes	51079	?Mitochondrial complex I deficiency, nuclear type 28, 618249 Y-Autosomal recessive; {Thyroid carcinoma, Hurthle cell}, 607464 (3)	609435	AR	yes	yes	yes	yes
ENSG00000131495	NDUFA2	OXPHOS subunits, assembly factors, and electron carriers	CI subunits	no	AR	272	yes	yes	4695	?Mitochondrial complex I deficiency, nuclear type 13, 618235 Y-Autosomal recessive	602137	AR	yes	yes	yes	yes
ENSG00000189043	NDUFA4	OXPHOS subunits, assembly factors, and electron carriers	CIV subunits	no	AR	272	yes	no	.	.	.	.	yes	yes	yes	yes
ENSG00000184983	NDUFA6	OXPHOS subunits, assembly factors, and electron carriers	CI subunits	no	AR	413	yes	yes	4700	Mitochondrial complex I deficiency, nuclear type 33, 618253 Y-Autosomal recessive	602138	AR	yes	yes	no	yes
ENSG00000119421	NDUFA8	OXPHOS subunits, assembly factors, and electron carriers	CI subunits	no	Unknown	413	yes	no	.	.	.	.	yes	no	no	no
ENSG00000139180	NDUFA9	OXPHOS subunits, assembly factors, and electron carriers	CI subunits	no	AR	272	yes	yes	4704	Mitochondrial complex I deficiency, nuclear type 26, 618247 Y-Autosomal recessive	603834	AR	yes	yes	yes	yes
ENSG00000137806	NDUFAF1	OXPHOS subunits, assembly factors, and electron carriers	CI assembly factors	no	AR	272	yes	yes	51103	Mitochondrial complex I deficiency, nuclear type 11, 618234 Y-Autosomal recessive	606934	AR	yes	yes	yes	yes
ENSG00000164182	NDUFAF2	OXPHOS subunits, assembly factors, and electron carriers	CI assembly factors	no	AR	272	yes	yes	91942	Mitochondrial complex I deficiency, nuclear type 10, 618233 Y-Autosomal recessive	609653	AR	yes	yes	yes	yes
ENSG00000178057	NDUFAF3	OXPHOS subunits, assembly factors, and electron carriers	CI assembly factors	no	AR	272	yes	yes	25915	Mitochondrial complex I deficiency, nuclear type 18, 618240 Y-Autosomal recessive	612911	AR	yes	yes	yes	yes
ENSG00000123545	NDUFAF4	OXPHOS subunits, assembly factors, and electron carriers	CI assembly factors	no	AR	272	yes	yes	29078	Mitochondrial complex I deficiency, nuclear type 15, 618237 Y-Autosomal recessive	611776	AR	yes	yes	yes	yes
ENSG00000101247	NDUFAF5	OXPHOS subunits, assembly factors, and electron carriers	CI assembly factors	no	AR	272	yes	yes	79133	Mitochondrial complex I deficiency, nuclear type 16, 618238 Y-Autosomal recessive	612360	AR	yes	yes	yes	yes
ENSG00000156170	NDUFAF6	OXPHOS subunits, assembly factors, and electron carriers	CI assembly factors	no	AR	272	yes	yes	137682	Mitochondrial complex I deficiency, nuclear type 17, 618239 Y-Autosomal recessive	612392	AR	yes	yes	yes	yes
ENSG00000003509	NDUFAF7	OXPHOS subunits, assembly factors, and electron carriers	CI assembly factors	no	AR	413	yes	no	.	.	.	.	no	yes	no	no
ENSG00000224877	NDUFAF8	OXPHOS subunits, assembly factors, and electron carriers	CI assembly factors	no	AR	413	yes	yes	284184	Mitochondrial complex I deficiency, nuclear type 34, 618776 Y-Autosomal recessive	618461	AR	yes	yes	no	no
ENSG00000140990	NDUFB10	OXPHOS subunits, assembly factors, and electron carriers	CI subunits	no	AR	272	yes	no	.	.	.	.	yes	yes	yes	yes
ENSG00000147123	NDUFB11	OXPHOS subunits, assembly factors, and electron carriers	CI subunits	no	XLD	272	yes	yes	54539	Linear skin defects with multiple congenital anomalies 3, 300952 Y-X-linked dominant; ?Mitochondrial complex I deficiency, nuclear type 30, 301021 Y-X-linked	300403	XLD	yes	yes	yes	yes
ENSG00000119013	NDUFB3	OXPHOS subunits, assembly factors, and electron carriers	CI subunits	no	AR	272	yes	yes	4709	Mitochondrial complex I deficiency, nuclear type 25, 618246 Y-Autosomal recessive	603839	AR	yes	yes	yes	yes
ENSG00000166136	NDUFB8	OXPHOS subunits, assembly factors, and electron carriers	CI subunits	no	AR	413	yes	yes	4714	Mitochondrial complex I deficiency, nuclear type 32, 618252 Y-Autosomal recessive	602140	AR	yes	yes	no	yes
ENSG00000147684	NDUFB9	OXPHOS subunits, assembly factors, and electron carriers	CI subunits	no	AR	272	yes	yes	4715	?Mitochondrial complex I deficiency, nuclear type 24, 618245 Y-Autosomal recessive	601445	AR	yes	yes	yes	yes
ENSG00000023228	NDUFS1	OXPHOS subunits, assembly factors, and electron carriers	CI subunits	no	AR	272	yes	yes	4719	Mitochondrial complex I deficiency, nuclear type 5, 618226 Y-Autosomal recessive	157655	AR	yes	yes	yes	yes
ENSG00000158864	NDUFS2	OXPHOS subunits, assembly factors, and electron carriers	CI subunits	no	AR	272	yes	yes	4720	Mitochondrial complex I deficiency, nuclear type 6, 618228 Y-Autosomal recessive	602985	AR	yes	yes	yes	yes
ENSG00000213619	NDUFS3	OXPHOS subunits, assembly factors, and electron carriers	CI subunits	no	AR	272	yes	yes	4722	Mitochondrial complex I deficiency, nuclear type 8, 618230 Y-Autosomal recessive	603846	AR	yes	yes	yes	yes
ENSG00000164258	NDUFS4	OXPHOS subunits, assembly factors, and electron carriers	CI subunits	no	AR	272	yes	yes	4724	Mitochondrial complex I deficiency, nuclear type 1, 252010 Y-Autosomal recessive	602694	AR	yes	yes	yes	yes
ENSG00000145494	NDUFS6	OXPHOS subunits, assembly factors, and electron carriers	CI subunits	no	AR	272	yes	yes	4726	Mitochondrial complex I deficiency, nuclear type 9, 618232 Y-Autosomal recessive	603848	AR	yes	yes	yes	yes
ENSG00000115286	NDUFS7	OXPHOS subunits, assembly factors, and electron carriers	CI subunits	no	AR	272	yes	yes	374291	Mitochondrial complex I deficiency, nuclear type 3, 618224 Y-Autosomal recessive	601825	AR	yes	yes	yes	yes
ENSG00000110717	NDUFS8	OXPHOS subunits, assembly factors, and electron carriers	CI subunits	no	AR	272	yes	yes	4728	Mitochondrial complex I deficiency, nuclear type 2, 618222 Y-Autosomal recessive	602141	AR	yes	yes	yes	yes
ENSG00000167792	NDUFV1	OXPHOS subunits, assembly factors, and electron carriers	CI subunits	no	AR	272	yes	yes	4723	Mitochondrial complex I deficiency, nuclear type 4, 618225 Y-Autosomal recessive	161015	AR	yes	yes	yes	yes
ENSG00000178127	NDUFV2	OXPHOS subunits, assembly factors, and electron carriers	CI subunits	no	AR	272	yes	yes	4729	Mitochondrial complex I deficiency, nuclear type 7, 618229 Y-Autosomal recessive	600532	AR	yes	yes	yes	yes
ENSG00000244005	NFS1	Metabolism of cofactors	Iron–sulphur cluster protein biosynthesis	no	AR	272	yes	no	.	.	.	.	yes	yes	yes	yes
ENSG00000169599	NFU1	Metabolism of cofactors	Iron–sulphur cluster protein biosynthesis	no	AR	272	yes	yes	27247	Multiple mitochondrial dysfunctions syndrome 1, 605711 Y-Autosomal recessive	608100	AR	yes	yes	yes	yes
ENSG00000103024	NME3	Mitochondrial dynamics, homeostasis, and quality control	Fusion	no	AR	413	yes	no	.	.	.	.	yes	no	no	no
ENSG00000173614	NMNAT1	Metabolism of cofactors	NADPH metabolism	no	AR	413	no	yes	64802	Leber congenital amaurosis 9, 608553 Y-Autosomal recessive	608700	AR	no	yes	no	no
ENSG00000112992	NNT	Metabolism of cofactors	NADPH metabolism	no	AR	413	yes	yes	23530	Glucocorticoid deficiency 4, with or without mineralocorticoid deficiency, 614736 Y-Autosomal recessive	607878	AR	no	yes	no	no
ENSG00000178694	NSUN3	Mitochondrial DNA replication and expression	RNA processing	no	AR	272	yes	no	.	.	.	.	yes	yes	yes	yes
ENSG00000151413	NUBPL	Metabolism of cofactors / OXPHOS subunits, assembly factors, and electron carriers	Iron–sulphur cluster protein biosynthesis / CI assembly factors	yes	AR	272	yes	yes	80224	Mitochondrial complex I deficiency, nuclear type 21, 618242 Y-Autosomal recessive	613621	AR	yes	yes	yes	yes
ENSG00000105953	OGDH	Metabolism of substrates	Tricarboxylic acid cycle enzymes	no	AR	413	yes	yes	4967	Alpha-ketoglutarate dehydrogenase deficiency	203740	AR	yes	yes	no	no
ENSG00000198836	OPA1	Mitochondrial dynamics, homeostasis, and quality control	Morphology	no	AR/AD	272	yes	yes	4976	{Glaucoma, normal tension, susceptibility to}, 606657 (3); Behr syndrome, 210000 Y-Autosomal recessive; Optic atrophy 1, 165500 Y-Autosomal dominant; Optic atrophy plus syndrome, 125250 Y-Autosomal dominant; ?Mitochondrial DNA depletion syndrome 14 (encephalocardiomyopathic type), 616896 (3)	605290	AR+AD	yes	yes	yes	yes
ENSG00000125741	OPA3	Mitochondrial dynamics, homeostasis, and quality control	Mitochondrial membrane phospholipid and import machinery	no	AR/AD	272	yes	yes	80207	3-methylglutaconic aciduria, type III, 258501 Y-Autosomal recessive; Optic atrophy 3 with cataract, 165300 Y-Autosomal dominant	606580	AR+AD	yes	yes	yes	yes
ENSG00000155463	OXA1L	OXPHOS subunits, assembly factors, and electron carriers	CIV assembly factors / CV assembly factors	yes	AR	413	yes	no	.	.	.	.	yes	yes	no	yes
ENSG00000083720	OXCT1	Metabolism of substrates	Ketone bodies	no	AR	413	yes	yes	5019	Succinyl CoA:3-oxoacid CoA transferase deficiency	601424	AR	yes	no	no	no
ENSG00000217930	PAM16	Mitochondrial dynamics, homeostasis, and quality control	Mitochondrial membrane phospholipid and import machinery	no	AR	413	yes	yes	51025	Spondylometaphyseal dysplasia, Megarbane-Dagher-Melike type, 613320 Y-Autosomal recessive	614336	AR	yes	yes	no	no
ENSG00000125779	PANK2	Metabolism of cofactors	CoA metabolism and transport	no	AR	272	yes	yes	80025	HARP syndrome, 607236 Y-Autosomal recessive; Neurodegeneration with brain iron accumulation 1, 234200 Y-Autosomal recessive	606157	AR	yes	yes	yes	yes
ENSG00000162396	PARS2	Mitochondrial DNA replication and expression	Mitochondrial tRNA synthetases	no	AR	272	yes	yes	25973	Epileptic encephalopathy, early infantile, 75, 618437 Y-Autosomal recessive	612036	AR	yes	yes	yes	yes
ENSG00000173599	PC	Metabolism of substrates / Metabolism of cofactors	Anaplerosis / Biotin metabolism	yes	AR	413	yes	yes	5091	Pyruvate carboxylase deficiency, 266150 Y-Autosomal recessive	608786	AR	yes	yes	no	yes
ENSG00000174840	PDE12	Mitochondrial DNA replication and expression	RNA processing	no	AR	413	yes	no	.	.	.	.	no	yes	no	no
ENSG00000131828	PDHA1	Metabolism of substrates	Pyruvate metabolism	no	XLD	272	yes	yes	5160	Pyruvate dehydrogenase E1-alpha deficiency, 312170 Y-X-linked dominant	300502	XLD	yes	yes	yes	yes
ENSG00000168291	PDHB	Metabolism of substrates	Pyruvate metabolism	no	AR	272	yes	no	.	Pyruvate dehydrogenase E1-beta deficiency	.	.	yes	yes	yes	yes
ENSG00000110435	PDHX	Metabolism of substrates	Pyruvate metabolism	no	AR	272	yes	yes	8050	Lacticacidemia due to PDX1 deficiency, 245349 Y-Autosomal recessive	608769	AR	yes	yes	yes	yes
ENSG00000067992	PDK3	Metabolism of substrates	Pyruvate metabolism	no	XLD	272	yes	yes	5165	?Charcot-Marie-Tooth disease, X-linked dominant, 6, 300905 Y-X-linked dominant	300906	XLD	yes	yes	yes	yes
ENSG00000164951	PDP1	Metabolism of substrates	Pyruvate metabolism	no	AR	272	yes	yes	54704	Pyruvate dehydrogenase phosphatase deficiency, 608782 Y-Autosomal recessive	605993	AR	yes	yes	yes	yes
ENSG00000090857	PDPR	Metabolism of substrates	Pyruvate metabolism	no	AR	413	yes	no	.	.	.	.	no	yes	no	no
ENSG00000148459	PDSS1	OXPHOS subunits, assembly factors, and electron carriers	Coenzyme Q10	no	AR	272	yes	yes	23590	Coenzyme Q10 deficiency, primary, 2, 614651 Y-Autosomal recessive	607429	AR	yes	yes	yes	yes
ENSG00000164494	PDSS2	OXPHOS subunits, assembly factors, and electron carriers	Coenzyme Q10	no	AR	272	yes	yes	57107	Coenzyme Q10 deficiency, primary, 3, 614652 Y-Autosomal recessive	610564	AR	yes	yes	yes	yes
ENSG00000229833	PET100	OXPHOS subunits, assembly factors, and electron carriers	CIV assembly factors	no	AR	272	yes	yes	100131801	Mitochondrial complex IV deficiency	220110	AR	yes	yes	yes	yes
ENSG00000232838	PET117	OXPHOS subunits, assembly factors, and electron carriers	CIV assembly factors	no	AR	272	yes	no	.	.	.	.	yes	yes	yes	yes
ENSG00000158828	PINK1	Mitochondrial dynamics, homeostasis, and quality control	Mitochondrial protein quality control	no	AR	413	yes	yes	65018	Parkinson disease 6, early onset, 605909 Y-Autosomal recessive	608309	AR	no	yes	no	no
ENSG00000241878	PISD	Mitochondrial dynamics, homeostasis, and quality control	Mitochondrial membrane phospholipid and import machinery	no	AR	413	yes	yes	23761	Liberfarb syndrome	618889	AR	yes	no	no	no
ENSG00000107959	PITRM1	Mitochondrial dynamics, homeostasis, and quality control	Mitochondrial protein quality control	no	AR	413	yes	no	.	.	.	.	yes	yes	no	yes
ENSG00000184381	PLA2G6	Others / Unknown function	Others / Unknown function	no	AR	413	no	yes	8398	Infantile neuroaxonal dystrophy 1, 256600 Y-Autosomal recessive; Parkinson disease 14, autosomal recessive, 612953 Y-Autosomal recessive; Neurodegeneration with brain iron accumulation 2B, 610217 Y-Autosomal recessive	603604	AR	no	yes	yes	yes
ENSG00000165688	PMPCA	Mitochondrial dynamics, homeostasis, and quality control	Mitochondrial membrane phospholipid and import machinery	no	AR	272	yes	yes	23203	Spinocerebellar ataxia, autosomal recessive 2, 213200 Y-Autosomal recessive	613036	AR	yes	yes	yes	yes
ENSG00000105819	PMPCB	Mitochondrial dynamics, homeostasis, and quality control	Mitochondrial protein quality control	no	AR	413	yes	yes	9512	Multiple mitochondrial dysfunctions syndrome 6, 617954 Y-Autosomal recessive	603131	AR	yes	yes	no	yes
ENSG00000006757	PNPLA4	Others / Unknown function	Others / Unknown function	no	XLD	413	no	no	.	.	.	.	no	yes	yes	yes
ENSG00000135241	PNPLA8	Mitochondrial dynamics, homeostasis, and quality control	Mitochondrial membrane phospholipid and import machinery	no	AR	413	yes	yes	50640	?Mitochondrial myopathy with lactic acidosis, 251950 Y-Autosomal recessive	612123	AR	no	yes	yes	yes
ENSG00000138035	PNPT1	Mitochondrial DNA replication and expression	RNA processing	no	AR	272	yes	yes	87178	Deafness, autosomal recessive 70, 614934 Y-Autosomal recessive; Combined oxidative phosphorylation deficiency 13, 614932 Y-Autosomal recessive	610316	AR	yes	yes	yes	yes
ENSG00000140521	POLG	Mitochondrial DNA replication and expression	Replication, maintenance, and transcription	no	AR/AD	272	yes	yes	5428	Progressive external ophthalmoplegia, autosomal dominant 1, 157640 Y-Autosomal dominant; Mitochondrial DNA depletion syndrome 4B (MNGIE type), 613662 Y-Autosomal recessive; Mitochondrial recessive ataxia syndrome (includes SANDO and SCAE), 607459 Y-Autosomal recessive; Mitochondrial DNA depletion syndrome 4A (Alpers type), 203700 Y-Autosomal recessive; Progressive external ophthalmoplegia, autoso…	174763	AR+AD	yes	yes	yes	yes
ENSG00000256525	POLG2	Mitochondrial DNA replication and expression	Replication, maintenance, and transcription	no	AR/AD	272	yes	yes	11232	Progressive external ophthalmoplegia with mitochondrial DNA deletions, autosomal dominant 4, 610131 Y-Autosomal dominant; Mitochondrial DNA depletion syndrome 16 (hepatic type), 618528 Y-Autosomal recessive	604983	AR+AD	yes	yes	yes	yes
ENSG00000099821	POLRMT	Mitochondrial DNA replication and expression	Replication, maintenance, and transcription	no	AR	413	yes	no	.	.	.	.	no	yes	no	no
ENSG00000104356	POP1	Others / Unknown function	Others / Unknown function	no	AR	413	no	yes	10940	Anauxetic dysplasia 2, 617396 Y-Autosomal recessive	602486	AR	no	yes	no	no
ENSG00000138777	PPA2	Metabolism of substrates	Tricarboxylic acid cycle enzymes	no	AR	272	yes	yes	27068	?Sudden cardiac failure, alcohol-induced, 617223 Y-Autosomal recessive; Sudden cardiac failure, infantile, 617222 Y-Autosomal recessive	609988	AR	yes	yes	yes	yes
ENSG00000127125	PPCS	Metabolism of cofactors	CoA metabolism and transport	no	AR	413	no	yes	79717	Cardiomyopathy, dilated, 2C, 618189 Y-Autosomal recessive	609853	AR	no	yes	no	yes
ENSG00000143224	PPOX	Metabolism of cofactors	Haem biosynthesis	no	AD	413	yes	yes	5498	Porphyria variegata, 176200 Y-Autosomal dominant	600923	AD	yes	no	no	no
ENSG00000185345	PRKN	Mitochondrial dynamics, homeostasis, and quality control	Mitochondrial protein quality control	no	AR	413	no	yes	5071	Parkinson disease, juvenile, type 2, 600116 Y-Autosomal recessive; Ovarian cancer, somatic, 167000 (3); Adenocarcinoma of lung, somatic, 211980 (3)	602544	AR	no	yes	no	no
ENSG00000132300	PTCD3	Mitochondrial DNA replication and expression	Mitochondrial ribosomes	no	AR	413	yes	no	.	.	.	.	yes	yes	no	no
ENSG00000141378	PTRH2	Mitochondrial dynamics, homeostasis, and quality control	Apoptosis defect	no	AR	413	yes	yes	51651	Infantile-onset multisystem neurologic, endocrine, and pancreatic disease, 616263 Y-Autosomal recessive	608625	AR	no	yes	no	no
ENSG00000177192	PUS1	Mitochondrial DNA replication and expression	RNA processing	no	AR	272	yes	yes	80324	Myopathy, lactic acidosis, and sideroblastic anemia 1, 600462 Y-Autosomal recessive	608109	AR	yes	yes	yes	yes
ENSG00000183010	PYCR1	Metabolism of substrates	Fatty acid oxidation	no	AR	413	yes	yes	5831	Cutis laxa, autosomal recessive, type IIIB, 614438 (3); Cutis laxa, autosomal recessive, type IIB, 612940 Y-Autosomal recessive	179035	AR	no	yes	no	no
ENSG00000130348	QRSL1	Mitochondrial DNA replication and expression	Mitochondrial tRNA synthetases	no	AR	272	yes	yes	55278	Combined oxidative phosphorylation deficiency 40	618835	AR	yes	yes	yes	yes
ENSG00000146282	RARS2	Mitochondrial DNA replication and expression	Mitochondrial tRNA synthetases	no	AR	272	yes	yes	57038	Pontocerebellar hypoplasia, type 6, 611523 Y-Autosomal recessive	611524	AR	yes	yes	yes	yes
ENSG00000155906	RMND1	Mitochondrial DNA replication and expression	Translation regulation	no	AR	272	yes	yes	55005	Combined oxidative phosphorylation deficiency 11, 614922 Y-Autosomal recessive	614917	AR	yes	yes	yes	yes
ENSG00000171865	RNASEH1	Mitochondrial DNA replication and expression	Replication, maintenance, and transcription	no	AR	272	yes	yes	246243	Progressive external ophthalmoplegia with mitochondrial DNA deletions, autosomal recessive 2, 616479 Y-Autosomal recessive	604123	AR	yes	yes	yes	yes
ENSG00000154134	ROBO3	Others / Unknown function	Others / Unknown function	no	AR	413	no	yes	64221	Gaze palsy, familial horizontal, with progressive scoliosis, 1, 607313 Y-Autosomal recessive	608630	AR	no	yes	no	no
ENSG00000048392	RRM2B	Mitochondrial DNA replication and expression	Nucleotide pool maintenance	no	AR/AD	272	no	yes	50484	Progressive external ophthalmoplegia with mitochondrial DNA deletions, autosomal dominant 5, 613077 Y-Autosomal dominant; Mitochondrial DNA depletion syndrome 8A (encephalomyopathic type with renal tubulopathy), 612075 Y-Autosomal recessive; Mitochondrial DNA depletion syndrome 8B (MNGIE type), 612075 Y-Autosomal recessive	604712	AR+AD	yes	yes	yes	yes
ENSG00000130347	RTN4IP1	OXPHOS subunits, assembly factors, and electron carriers	Other	no	AR	272	yes	yes	84816	Optic atrophy 10 with or without ataxia, mental retardation, and seizures, 616732 Y-Autosomal recessive	610502	AR	yes	yes	yes	yes
ENSG00000151835	SACS	Mitochondrial dynamics, homeostasis, and quality control	Mitochondrial protein quality control	no	AR	272	no	yes	26278	Spastic ataxia, Charlevoix-Saguenay type, 270550 Y-Autosomal recessive	604490	AR	yes	yes	yes	yes
ENSG00000101347	SAMHD1	Mitochondrial DNA replication and expression	Nucleotide pool maintenance	no	AR	272	no	yes	25939	?Chilblain lupus 2, 614415 Y-Autosomal dominant; Aicardi-Goutieres syndrome 5, 612952 Y-Autosomal recessive	606754	AR+AD	yes	yes	yes	yes
ENSG00000104835	SARS2	Mitochondrial DNA replication and expression	Mitochondrial tRNA synthetases	no	AR	272	yes	yes	54938	Hyperuricemia, pulmonary hypertension, renal failure, and alkalosis, 613845 Y-Autosomal recessive	612804	AR	yes	yes	yes	yes
ENSG00000133028	SCO1	Metabolism of cofactors / OXPHOS subunits, assembly factors, and electron carriers	Copper transport / CIV assembly factors	yes	AR	272	yes	yes	6341	Mitochondrial complex IV deficiency	220110	AR	yes	yes	yes	yes
ENSG00000130489	SCO2	Metabolism of cofactors / OXPHOS subunits, assembly factors, and electron carriers	Copper transport / CIV assembly factors	yes	AR/AD	272	yes	yes	9997	Myopia 6, 608908 Y-Autosomal dominant; Cardioencephalomyopathy, fatal infantile, due to cytochrome c oxidase deficiency 1, 604377 Y-Autosomal recessive	604272	AR+AD	yes	yes	yes	yes
ENSG00000073578	SDHA	OXPHOS subunits, assembly factors, and electron carriers	CII subunits	no	AR/AD	272	yes	yes	6389	Cardiomyopathy, dilated, 1GG, 613642 (3); Leigh syndrome, 256000 Y-Mitochondrial, Autosomal recessive; Paragangliomas 5, 614165 Y-Autosomal dominant; Mitochondrial respiratory chain complex II deficiency, 252011 Y-Autosomal recessive	600857	AR+AD	yes	yes	yes	yes
ENSG00000205138	SDHAF1	OXPHOS subunits, assembly factors, and electron carriers	CII assembly factors	no	AR	272	yes	yes	644096	Mitochondrial complex II deficiency, 252011 Y-Autosomal recessive	612848	AR	yes	yes	yes	yes
ENSG00000167985	SDHAF2	OXPHOS subunits, assembly factors, and electron carriers	CII assembly factors	no	AD	413	yes	yes	54949	Paragangliomas 2, 601650 Y-Autosomal dominant	613019	AD	yes	yes	no	no
ENSG00000117118	SDHB	OXPHOS subunits, assembly factors, and electron carriers	CII subunits	no	AR/AD	272	yes	yes	6390	Gastrointestinal stromal tumor, 606764 Y-Isolated cases, Autosomal dominant; Pheochromocytoma, 171300 Y-Autosomal dominant; Paragangliomas 4, 115310 Y-Autosomal dominant; Paraganglioma and gastric stromal sarcoma, 606864 (3)	185470	AD	yes	yes	yes	yes
ENSG00000143252	SDHC	OXPHOS subunits, assembly factors, and electron carriers	CII subunits	no	AD	413	yes	yes	6391	Paragangliomas 3, 605373 Y-Autosomal dominant; Paraganglioma and gastric stromal sarcoma, 606864 (3); Gastrointestinal stromal tumor, 606764 Y-Isolated cases, Autosomal dominant	602413	AD	yes	yes	no	no
ENSG00000204370	SDHD	OXPHOS subunits, assembly factors, and electron carriers	CII subunits	no	AR/AD	272	yes	yes	6392	Paragangliomas 1, with or without deafness, 168000 Y-Autosomal dominant; Mitochondrial complex II deficiency, 252011 Y-Autosomal recessive; Paraganglioma and gastric stromal sarcoma, 606864 (3); Pheochromocytoma, 171300 Y-Autosomal dominant	602690	AR+AD	yes	yes	yes	yes
ENSG00000187742	SECISBP2	Metabolism of cofactors	Selenocysteine Metabolism	no	AR	413	yes	yes	79048	Thyroid hormone metabolism, abnormal, 609698 Y-Autosomal recessive	607693	AR	no	yes	no	no
ENSG00000109618	SEPSECS	Metabolism of cofactors	Selenocysteine Metabolism	no	AR	413	no	yes	51091	Pontocerebellar hypoplasia type 2D, 613811 Y-Autosomal recessive	613009	AR	no	yes	no	no
ENSG00000122335	SERAC1	Mitochondrial dynamics, homeostasis, and quality control	Mitochondrial membrane phospholipid and import machinery	no	AR	272	yes	yes	84947	3-methylglutaconic aciduria with deafness, encephalopathy, and Leigh-like syndrome, 614739 Y-Autosomal recessive	614725	AR	yes	yes	yes	yes
ENSG00000183605	SFXN4	Metabolism of cofactors	Haem biosynthesis	no	AR	272	yes	yes	119559	Combined oxidative phosphorylation deficiency 18, 615578 Y-Autosomal recessive	615564	AR	yes	yes	yes	yes
ENSG00000117479	SLC19A2	Metabolism of cofactors	Thiamine metabolism and transport	no	AR	413	no	yes	10560	Thiamine-responsive megaloblastic anemia syndrome, 249270 Y-Autosomal recessive	603941	AR	no	yes	yes	yes
ENSG00000135917	SLC19A3	Metabolism of cofactors	Thiamine metabolism and transport	no	AR	272	no	yes	80704	Thiamine metabolism dysfunction syndrome 2 (biotin- or thiamine-responsive encephalopathy type 2), 607483 Y-Autosomal recessive	606152	AR	yes	yes	yes	yes
ENSG00000197375	SLC22A5	Metabolism of substrates	Fatty acid oxidation	no	AR	413	no	yes	6584	Carnitine deficiency, systemic primary, 212140 Y-Autosomal recessive	603377	AR	yes	no	no	no
ENSG00000100075	SLC25A1	Metabolism of substrates	Redox carriers	no	AR	272	yes	yes	6576	Myasthenic syndrome, congenital, 23, presynaptic, 618197 Y-Autosomal recessive; Combined D-2- and L-2-hydroxyglutaric aciduria, 615182 Y-Autosomal recessive	190315	AR	yes	yes	yes	yes
ENSG00000183048	SLC25A10	Metabolism of substrates	Mitochondrial carriers	no	AR	413	yes	no	.	.	.	.	yes	yes	no	yes
ENSG00000108528	SLC25A11	Metabolism of substrates	Mitochondrial carriers	no	AD	413	yes	yes	8402	Paragangliomas 6, 618464 Y-Autosomal dominant	604165	AD	no	yes	no	no
ENSG00000115840	SLC25A12	Metabolism of substrates	Mitochondrial carriers	no	AR	272	yes	yes	8604	Epileptic encephalopathy, early infantile, 39, 612949 Y-Autosomal recessive	603667	AR	yes	yes	yes	yes
ENSG00000004864	SLC25A13	Metabolism of substrates	Redox carriers	no	AR	413	yes	yes	10165	Citrullinemia, adult-onset type II, 603471 Y-Autosomal recessive; Citrullinemia, type II, neonatal-onset, 605814 Y-Autosomal recessive	603859	AR	yes	yes	no	no
ENSG00000102743	SLC25A15	Metabolism of substrates	Mitochondrial carriers	no	AR	413	yes	yes	10166	Hyperornithinemia-hyperammonemia-homocitrullinemia syndrome, 238970 Y-Autosomal recessive	603861	AR	no	yes	no	no
ENSG00000125454	SLC25A19	Metabolism of cofactors	Thiamine metabolism and transport	no	AR	272	yes	yes	60386	Thiamine metabolism dysfunction syndrome 4 (progressive polyneuropathy type), 613710 Y-Autosomal recessive; Microcephaly, Amish type, 607196 Y-Autosomal recessive	606521	AR	yes	yes	yes	yes
ENSG00000178537	SLC25A20	Metabolism of substrates	Fatty acid oxidation	no	AR	413	yes	yes	788	Carnitine-acylcarnitine translocase deficiency, 212138 Y-Autosomal recessive	613698	AR	yes	yes	no	no
ENSG00000183032	SLC25A21	Metabolism of substrates	Mitochondrial carriers	no	AR	413	yes	yes	89874	?Mitochondrial DNA depletion syndrome 18	618811	AR	no	yes	no	yes
ENSG00000177542	SLC25A22	Metabolism of substrates	Mitochondrial carriers	no	AR	413	yes	yes	79751	Epileptic encephalopathy, early infantile, 3, 609304 Y-Autosomal recessive	609302	AR	no	yes	no	no
ENSG00000085491	SLC25A24	Metabolism of substrates	Mitochondrial carriers	no	AD	413	yes	yes	29957	Fontaine progeroid syndrome, 612289 Y-Autosomal dominant	608744	AD	no	yes	yes	yes
ENSG00000144741	SLC25A26	Metabolism of substrates	Mitochondrial carriers	no	AR	272	yes	yes	115286	Combined oxidative phosphorylation deficiency 28, 616794 Y-Autosomal recessive	611037	AR	yes	yes	yes	yes
ENSG00000075415	SLC25A3	Metabolism of substrates	Mitochondrial carriers	no	AR	272	yes	no	.	Mitochondrial phosphate carrier deficiency	.	.	yes	yes	yes	yes
ENSG00000164933	SLC25A32	Metabolism of cofactors	Riboflavin metabolism and transport	no	AR	272	yes	yes	81034	?Exercise intolerance, riboflavin-responsive, 616839 Y-Autosomal recessive	610815	AR	yes	yes	yes	yes
ENSG00000144659	SLC25A38	Metabolism of cofactors	Haem biosynthesis	no	AR	413	yes	yes	54977	Anemia, sideroblastic, 2, pyridoxine-refractory, 205950 Y-Autosomal recessive	610819	AR	yes	yes	no	no
ENSG00000151729	SLC25A4	Metabolism of substrates	Mitochondrial carriers	no	AR/AD	272	yes	yes	291	Mitochondrial DNA depletion syndrome 12B (cardiomyopathic type) AR, 615418 Y-Autosomal recessive; Mitochondrial DNA depletion syndrome 12A (cardiomyopathic type) AD, 617184 Y-Autosomal dominant; Progressive external ophthalmoplegia with mitochondrial DNA deletions, autosomal dominant 2, 609283 Y-Autosomal dominant	103220	AR+AD	yes	yes	yes	yes
ENSG00000181035	SLC25A42	Metabolism of cofactors	CoA metabolism and transport	no	AR	272	yes	yes	284439	Metabolic crises, recurrent, with variable encephalomyopathic features and neurologic regression, 618416 Y-Autosomal recessive	610823	AR	yes	yes	yes	yes
ENSG00000164209	SLC25A46	Mitochondrial dynamics, homeostasis, and quality control	Fission / MICOS complex	yes	AR	272	yes	yes	91137	Neuropathy, hereditary motor and sensory, type VIB, 616505 Y-Autosomal recessive	610826	AR	yes	yes	yes	yes
ENSG00000169359	SLC33A1	Metabolism of cofactors	CoA metabolism and transport	no	AR/AD	413	no	yes	9197	Spastic paraplegia 42, autosomal dominant, 612539 Y-Autosomal dominant; Congenital cataracts, hearing loss, and neurodegeneration, 614482 Y-Autosomal recessive	603690	AR+AD	no	yes	no	no
ENSG00000138821	SLC39A8	Others / Unknown function	Others / Unknown function	no	AR	413	no	yes	64116	Congenital disorder of glycosylation, type IIn, 616721 Y-Autosomal recessive	608732	AR	no	yes	yes	yes
ENSG00000132517	SLC52A1	Metabolism of cofactors	Riboflavin metabolism and transport	no	AD	413	no	yes	55065	Riboflavin deficiency, 615026 Y-Autosomal dominant	607883	AD	no	yes	no	no
ENSG00000185803	SLC52A2	Metabolism of cofactors	Riboflavin metabolism and transport	no	AR	413	no	yes	79581	Brown-Vialetto-Van Laere syndrome 2, 614707 Y-Autosomal recessive	607882	AR	no	yes	no	no
ENSG00000101276	SLC52A3	Metabolism of cofactors	Riboflavin metabolism and transport	no	AR	413	no	yes	113278	Brown-Vialetto-Van Laere syndrome 1, 211530 Y-Autosomal recessive; ?Fazio-Londe disease, 211500 Y-Autosomal recessive	613350	AR	no	yes	no	no
ENSG00000133104	SPART	Others / Unknown function	Others / Unknown function	no	AR	413	no	yes	23111	Troyer syndrome, 275900 Y-Autosomal recessive	607111	AR	no	yes	no	no
ENSG00000145375	SPATA5	Others / Unknown function	Others / Unknown function	no	AR	413	no	yes	166378	Epilepsy, hearing loss, and mental retardation syndrome, 616577 Y-Autosomal recessive	613940	AR	no	yes	no	no
ENSG00000197912	SPG7	Mitochondrial dynamics, homeostasis, and quality control	Mitochondrial protein quality control	no	AR/AD	272	yes	yes	6687	Spastic paraplegia 7, autosomal recessive, 607259 Y-Autosomal dominant, Autosomal recessive	602783	AD	yes	yes	yes	yes
ENSG00000137767	SQOR	Metabolism of toxic compounds	Metabolism of toxic compounds	no	AR	413	yes	no	.	.	.	.	yes	yes	no	no
ENSG00000106028	SSBP1	Mitochondrial DNA replication and expression	Replication, maintenance, and transcription	no	AR/AD	413	yes	no	.	.	.	.	yes	yes	no	no
ENSG00000170581	STAT2	Mitochondrial dynamics, homeostasis, and quality control	Fission	no	AR	272	no	yes	6773	Immunodeficiency 44, 616636 Y-Autosomal recessive	600556	AR	yes	yes	yes	yes
ENSG00000136854	STXBP1	Others / Unknown function	Others / Unknown function	no	AD	413	no	yes	6812	Epileptic encephalopathy, early infantile, 4, 612164 Y-Autosomal dominant	602926	AD	no	yes	no	no
ENSG00000136143	SUCLA2	Metabolism of substrates	Tricarboxylic acid cycle enzymes	no	AR	272	yes	yes	8803	Mitochondrial DNA depletion syndrome 5 (encephalomyopathic with or without methylmalonic aciduria), 612073 Y-Autosomal recessive	603921	AR	yes	yes	yes	yes
ENSG00000163541	SUCLG1	Metabolism of substrates	Tricarboxylic acid cycle enzymes	no	AR	272	yes	yes	8802	Mitochondrial DNA depletion syndrome 9 (encephalomyopathic type with methylmalonic aciduria), 245400 Y-Autosomal recessive	611224	AR	yes	yes	yes	yes
ENSG00000148290	SURF1	OXPHOS subunits, assembly factors, and electron carriers	CIV assembly factors	no	AR	272	yes	yes	6834	Leigh syndrome, due to COX IV deficiency, 256000 Y-Mitochondrial, Autosomal recessive; Charcot-Marie-Tooth disease, type 4K, 616684 Y-Autosomal recessive	185620	AR	yes	yes	yes	yes
ENSG00000136463	TACO1	OXPHOS subunits, assembly factors, and electron carriers	CIV assembly factors	no	AR	272	yes	yes	51204	Mitochondrial complex IV deficiency	220110	AR	yes	yes	yes	yes
ENSG00000183597	TANGO2	Others / Unknown function	Others / Unknown function	no	AR	413	no	yes	128989	Metabolic encephalomyopathic crises, recurrent, with rhabdomyolysis, cardiac arrhythmias, and neurodegeneration, 616878 Y-Autosomal recessive	616830	AR	no	yes	no	no
ENSG00000143374	TARS2	Mitochondrial DNA replication and expression	Mitochondrial tRNA synthetases	no	AR	272	yes	yes	80222	?Combined oxidative phosphorylation deficiency 21, 615918 Y-Autosomal recessive	612805	AR	yes	yes	yes	yes
ENSG00000102125	TAZ	Mitochondrial dynamics, homeostasis, and quality control	Mitochondrial membrane phospholipid and import machinery	no	XLR	272	no	yes	6901	Barth syndrome, 302060 Y-X-linked recessive	300394	XLR	yes	yes	yes	yes
ENSG00000108064	TFAM	Mitochondrial DNA replication and expression	Replication, maintenance, and transcription	no	AR	413	yes	yes	7019	?Mitochondrial DNA depletion syndrome 15 (hepatocerebral type), 617156 Y-Autosomal recessive	600438	AR	no	yes	yes	yes
ENSG00000113272	THG1L	Mitochondrial DNA replication and expression	RNA processing	no	AR	413	yes	yes	54974	Spinocerebellar ataxia, autosomal recessive 28, 618800 Y-Autosomal recessive	618802	AR	yes	yes	no	no
ENSG00000177370	TIMM22	Mitochondrial dynamics, homeostasis, and quality control	Mitochondrial membrane phospholipid and import machinery	no	AR	413	yes	yes	29928	?Combined oxidative phosphorylation deficiency 43	618851	AR	yes	yes	no	yes
ENSG00000105197	TIMM50	Mitochondrial dynamics, homeostasis, and quality control	Mitochondrial membrane phospholipid and import machinery	no	AR	272	yes	yes	92609	3-methylglutaconic aciduria, type IX, 617698 Y-Autosomal recessive	607381	AR	yes	yes	yes	yes
ENSG00000126953	TIMM8A	Mitochondrial dynamics, homeostasis, and quality control	Mitochondrial membrane phospholipid and import machinery	no	XLR	272	yes	yes	1678	Mohr-Tranebjaerg syndrome, 304700 Y-X-linked recessive	300356	XLR	yes	yes	yes	yes
ENSG00000113845	TIMMDC1	OXPHOS subunits, assembly factors, and electron carriers	CI assembly factors	no	AR	272	yes	yes	51300	Mitochondrial complex I deficiency, nuclear type 31, 618251 Y-Autosomal recessive	615534	AR	yes	yes	yes	yes
ENSG00000166548	TK2	Mitochondrial DNA replication and expression	Nucleotide pool maintenance	no	AR	272	yes	yes	7084	Mitochondrial DNA depletion syndrome 2 (myopathic type), 609560 Y-Autosomal recessive; ?Progressive external ophthalmoplegia with mitochondrial DNA deletions, autosomal recessive 3, 617069 Y-Autosomal recessive	188250	AR	yes	yes	yes	yes
ENSG00000171202	TMEM126A	OXPHOS subunits, assembly factors, and electron carriers	CI assembly factors	no	AR	413	yes	yes	84233	Optic atrophy 7, 612989 Y-Autosomal recessive	612988	AR	no	yes	no	no
ENSG00000171204	TMEM126B	OXPHOS subunits, assembly factors, and electron carriers	CI assembly factors	no	AR	272	yes	yes	55863	Mitochondrial complex I deficiency, nuclear type 29, 618250 Y-Autosomal recessive	615533	AR	yes	yes	yes	yes
ENSG00000164983	TMEM65	Others / Unknown function	Others / Unknown function	no	AR	272	yes	no	.	.	.	.	yes	yes	yes	yes
ENSG00000175606	TMEM70	OXPHOS subunits, assembly factors, and electron carriers	CV assembly factors	no	AR	272	yes	yes	54968	Mitochondrial complex V (ATP synthase) deficiency, nuclear type 2, 614052 Y-Autosomal recessive	612418	AR	yes	yes	yes	yes
ENSG00000154174	TOMM70	Mitochondrial dynamics, homeostasis, and quality control	Mitochondrial membrane phospholipid and import machinery	no	AR	413	yes	no	.	.	.	.	yes	no	no	no
ENSG00000177302	TOP3A	Mitochondrial DNA replication and expression	Replication, maintenance, and transcription	no	AR	413	yes	yes	7156	Microcephaly, growth restriction, and increased sister chromatid exchange 2, 618097 Y-Autosomal recessive; ?Progressive external ophthalmoplegia with mitochondrial DNA deletions, autosomal recessive 5, 618098 Y-Autosomal recessive	601243	AR	no	yes	no	yes
ENSG00000196511	TPK1	Metabolism of cofactors	Thiamine metabolism and transport	no	AR	272	no	yes	27010	Thiamine metabolism dysfunction syndrome 5 (episodic encephalopathy type), 614458 Y-Autosomal recessive	606370	AR	yes	yes	yes	yes
ENSG00000182606	TRAK1	Others / Unknown function	Others / Unknown function	no	AR	413	no	yes	22906	Epileptic encephalopathy, early infantile, 68, 618201 Y-Autosomal recessive	608112	AR	no	yes	yes	yes
ENSG00000126602	TRAP1	Mitochondrial dynamics, homeostasis, and quality control	Mitochondrial protein quality control	no	AR	413	yes	no	.	.	.	.	no	yes	no	no
ENSG00000043514	TRIT1	Mitochondrial DNA replication and expression	RNA processing	no	AR	272	yes	yes	54802	Combined oxidative phosphorylation deficiency 35, 617873 Y-Autosomal recessive	617840	AR	yes	yes	yes	yes
ENSG00000174173	TRMT10C	Mitochondrial DNA replication and expression	RNA processing	no	AR	272	yes	yes	54931	Combined oxidative phosphorylation deficiency 30, 616974 Y-Autosomal recessive	615423	AR	yes	yes	yes	yes
ENSG00000126814	TRMT5	Mitochondrial DNA replication and expression	RNA processing	no	AR	272	no	yes	57570	Combined oxidative phosphorylation deficiency 26, 616539 Y-Autosomal recessive	611023	AR	yes	yes	yes	yes
ENSG00000100416	TRMU	Mitochondrial DNA replication and expression	RNA processing	no	AR	272	yes	yes	55687	Liver failure, transient infantile, 613070 Y-Autosomal recessive; {Deafness, mitochondrial, modifier of}, 580000 Y-Mitochondrial	610230	AR	yes	yes	yes	yes
ENSG00000072756	TRNT1	Mitochondrial DNA replication and expression	RNA processing	no	AR	272	yes	yes	51095	Sideroblastic anemia with B-cell immunodeficiency, periodic fevers, and developmental delay, 616084 Y-Autosomal recessive; Retinitis pigmentosa and erythrocytic microcytosis, 616959 Y-Autosomal recessive	612907	AR	yes	yes	yes	yes
ENSG00000123297	TSFM	Mitochondrial DNA replication and expression	Translation regulation	no	AR	272	yes	yes	10102	Combined oxidative phosphorylation deficiency 3, 610505 Y-Autosomal recessive	604723	AR	yes	yes	yes	yes
ENSG00000011295	TTC19	OXPHOS subunits, assembly factors, and electron carriers	CIII assembly factors	no	AR	272	yes	yes	54902	Mitochondrial complex III deficiency, nuclear type 2, 615157 Y-Autosomal recessive	613814	AR	yes	yes	yes	yes
ENSG00000178952	TUFM	Mitochondrial DNA replication and expression	Translation regulation	no	AR	272	yes	yes	7284	Combined oxidative phosphorylation deficiency 4, 610678 Y-Autosomal recessive	602389	AR	yes	yes	yes	yes
ENSG00000107815	TWNK	Mitochondrial DNA replication and expression	Replication, maintenance, and transcription	no	AR/AD	272	yes	yes	56652	Mitochondrial DNA depletion syndrome 7 (hepatocerebral type), 271245 Y-Autosomal recessive; Progressive external ophthalmoplegia with mitochondrial DNA deletions, autosomal dominant 3, 609286 Y-Autosomal dominant; Perrault syndrome 5, 616138 Y-Autosomal recessive	606075	AR+AD	yes	yes	yes	yes
ENSG00000100348	TXN2	Metabolism of toxic compounds	Metabolism of toxic compounds	no	AR	272	yes	yes	25828	?Combined oxidative phosphorylation deficiency 29, 616811 Y-Autosomal recessive	609063	AR	yes	yes	yes	yes
ENSG00000265972	TXNIP	Metabolism of toxic compounds	Metabolism of toxic compounds	no	AR	413	no	no	.	.	.	.	yes	yes	no	no
ENSG00000025708	TYMP	Mitochondrial DNA replication and expression	Nucleotide pool maintenance	no	AR	272	no	yes	1890	Mitochondrial DNA depletion syndrome 1 (MNGIE type), 603041 Y-Autosomal recessive	131222	AR	yes	yes	yes	yes
ENSG00000137288	UQCC2	OXPHOS subunits, assembly factors, and electron carriers	CIII assembly factors	no	AR	272	yes	yes	84300	Mitochondrial complex III deficiency, nuclear type 7, 615824 Y-Autosomal recessive	614461	AR	yes	yes	yes	yes
ENSG00000204922	UQCC3	OXPHOS subunits, assembly factors, and electron carriers	CIII assembly factors	no	AR	272	no	yes	790955	?Mitochondrial complex III deficiency, nuclear type 9, 616111 Y-Autosomal recessive	616097	AR	yes	yes	yes	yes
ENSG00000156467	UQCRB	OXPHOS subunits, assembly factors, and electron carriers	CIII subunits	no	AR	272	yes	yes	7381	Mitochondrial complex III deficiency, nuclear type 3, 615158 Y-Autosomal recessive	191330	AR	yes	yes	yes	yes
ENSG00000140740	UQCRC2	OXPHOS subunits, assembly factors, and electron carriers	CIII subunits	no	AR	272	yes	yes	7385	Mitochondrial complex III deficiency, nuclear type 5, 615160 Y-Autosomal recessive	191329	AR	yes	yes	yes	yes
ENSG00000169021	UQCRFS1	OXPHOS subunits, assembly factors, and electron carriers	CIII subunits	no	AR	413	yes	yes	7386	Mitochondrial complex III deficiency, nuclear type 10, 618775 Y-Autosomal recessive	191327	AR	yes	yes	no	no
ENSG00000164405	UQCRQ	OXPHOS subunits, assembly factors, and electron carriers	CIII subunits	no	AR	272	yes	yes	27089	Mitochondrial complex III deficiency, nuclear type 4, 615159 Y-Autosomal recessive	612080	AR	yes	yes	yes	yes
ENSG00000137411	VARS2	Mitochondrial DNA replication and expression	Mitochondrial tRNA synthetases	no	AR	272	yes	yes	57176	Combined oxidative phosphorylation deficiency 20, 615917 Y-Autosomal recessive	612802	AR	yes	yes	yes	yes
ENSG00000129003	VPS13C	Others / Unknown function	Others / Unknown function	no	AR	413	no	yes	54832	Parkinson disease 23, autosomal recessive, early onset, 616840 Y-Autosomal recessive	608879	AR	no	no	yes	yes
ENSG00000116874	WARS2	Mitochondrial DNA replication and expression	Mitochondrial tRNA synthetases	no	AR	272	yes	yes	10352	Neurodevelopmental disorder, mitochondrial, with abnormal movements and lactic acidosis, with or without seizures, 617710 Y-Autosomal recessive	604733	AR	yes	yes	yes	yes
ENSG00000109501	WFS1	Others / Unknown function	Others / Unknown function	no	AR/AD	413	no	yes	7466	?Cataract 41, 116400 Y-Autosomal dominant; Deafness, autosomal dominant 6/14/38, 600965 Y-Autosomal dominant; {Diabetes mellitus, noninsulin-dependent, association with}, 125853 Y-Autosomal dominant; Wolfram-like syndrome, autosomal dominant, 614296 Y-Autosomal dominant; Wolfram syndrome 1, 222300 Y-Autosomal recessive	606201	AR+AD	no	yes	no	no
ENSG00000196236	XPNPEP3	Mitochondrial dynamics, homeostasis, and quality control	Mitochondrial membrane phospholipid and import machinery	no	AR	413	yes	yes	63929	Nephronophthisis-like nephropathy 1, 613159 Y-Autosomal recessive	613553	AR	yes	yes	no	no
ENSG00000152422	XRCC4	Mitochondrial DNA replication and expression	DNA repair	no	AR	413	no	yes	7518	Short stature, microcephaly, and endocrine dysfunction, 616541 Y-Autosomal recessive	194363	AR	no	yes	no	no
ENSG00000139131	YARS2	Mitochondrial DNA replication and expression	Mitochondrial tRNA synthetases	no	AR	272	yes	yes	51067	Myopathy, lactic acidosis, and sideroblastic anemia 2, 613561 Y-Autosomal recessive	610957	AR	yes	yes	yes	yes
ENSG00000136758	YME1L1	Mitochondrial dynamics, homeostasis, and quality control	Morphology	no	AR	272	yes	yes	10730	?Optic atrophy 11, 617302 Y-Autosomal recessive	607472	AR	yes	yes	yes	yes
